# Supplementary material for: Direct synthesis of polysubstituted 2-aminothiophenes by Cu(ii)-catalyzed addition/oxidative cyclization of alkynoates with thioamides
Source: Royal Society of Chemistry journal article supplement (doi:10.1039/c4ob01534g), 2014-09-01
Supplement: c4ob01534g1.pdf [file c4ob01534g1.pdf]

## Supporting Information

# Direct Synthesis of Polysubstituted 2-Aminothiophenes through Cu(II)-Catalyzed Addition/Oxidative Cyclization of Alkynoates with Thioamides

Li-Shi Ge, Zheng-Lin Wang, Xing-Lan An, Xiaoyan Luo,\* and Wei-Ping Deng\*

### 1. General procedure for the preparation of thioamides.

#### 1a. Procedure for the preparation of 1a~1e, 1m and 1l.<sup>1-2</sup>

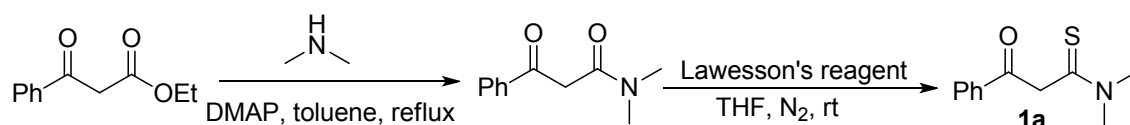

Ethyl 3-oxo-3-phenylpropanoate (1.74 mL, 10 mmol, 1 equiv), dimethylammonium chloride (1.63 g, 20 mmol, 2 equiv) and DMAP (5.62 g, 4.6 mmol, 0.46 equiv) were dissolved in 20 mL of toluene. The mixture was stirred sufficiently under reflux until the reaction was completed as judged by TLC. After cooling to room temperature, the solvent was quenched with water and extracted with ethyl acetate. The ethyl acetate layer was washed with brine, and dried over anhydrous Na<sub>2</sub>SO<sub>4</sub>. After the solvent was evaporated in vacuo, the residue was purified by column chromatography on 100–200 mesh silica gel to afford pure *N,N*-dimethyl-3-oxo-3-phenylpropanamide.

*N,N*-dimethyl-3-oxo-3-phenylpropanamide (765 mg, 4 mmol, 1.0 equiv) and Lawesson's reagent (889 mg, 2.2 mmol, 0.55 equiv) were suspended in 20 mL of anhydrous THF under an atmosphere of N<sub>2</sub>. The mixture was stirred sufficiently at ambient temperature until the reaction was completed as judged by TLC. The reaction was concentrated in vacuo, the residue was purified by column chromatography on 100–200 mesh silica gel to afford pure *N,N*-dimethyl-3-oxo-3-phenylpropanethioamide **1a**.

For the spectral analysis of **1a**, see; L. K. Ransborg, L. Albrecht, C. F. Weise, J. R. Bak and K. A. Jørgensen, *Org. Lett.*, 2012, **14**, 724;

**1b~1e**, **1m** and **1l** were all synthesized using this general procedure.

#### 2a. Procedure for the preparation of 1f~1k, 1n~1p.<sup>2-5</sup>

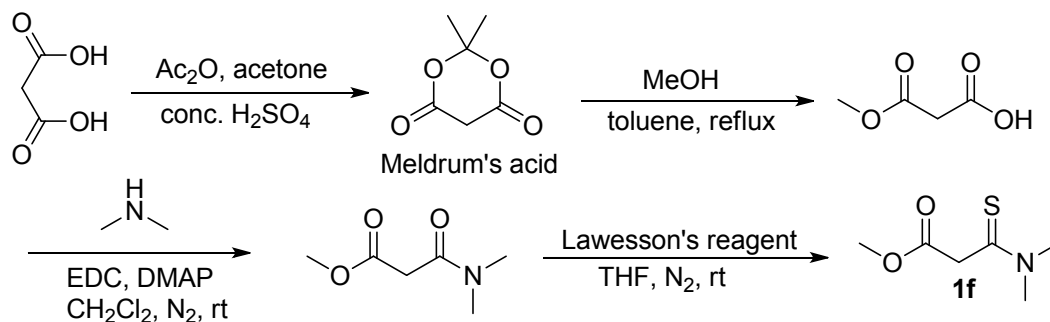

To a mixture of malonic acid (52 g, 499.7 mmol, 1 equiv) and acetic anhydride (62 mL, 639.6 mmol, 1.3 equiv) were added concentrated sulfuric acid (3 mL, 40.0 mmol, 0.08 equiv) with constant stirring in an ice-water bath. After 30 min, most of the malonic acid dissolved during cooling. Acetone (50.8 mL, 699.6 mmol, 1.4 equiv) was added slowly, and the reaction mixture was stirred sufficiently at ambient temperature until the reaction was completed as judged by TLC. After cooling in the refrigerator, the resulting crystals were filtered and washed with ice water to give a flaky white solid, which was dried in a vacuum desiccator.

Meldrum's acid (10 g, 69.4 mmol, 1 equiv) and methyl alcohol (4.4 mL, 104.1 mmol, 1.5 equiv) were dissolved in 20 mL of toluene. The reaction mixture was heated under reflux until the reaction was completed as judged by TLC. After cooling to room temperature, the reaction was concentrated in vacuo. The residue was purified by column chromatography on 100–200 mesh silica gel to afford pure 3-methoxy-3-oxopropanoic acid.

1-ethyl-3-(3-dimethylaminopropyl)carbodiimide hydrochloride (EDC, 3.82 g, 20 mmol, 2 equiv), 4-dimethylaminopyridine (DMAP, 489 mg, 4 mmol, 0.2 equiv) and dimethylammonium chloride (1.63 mg, 20.0 mmol, 1 equiv) were added to a solution of 3-methoxy-3-oxopropanoic acid (2.36 g, 20.0 mmol, 1 equiv) in 30 mL of anhydrous  $\text{CH}_2\text{Cl}_2$  under argon atmosphere. The reaction mixture was stirred sufficiently at ambient temperature until the reaction was completed as judged by TLC. The solvent was diluted with water and extracted with  $\text{CH}_2\text{Cl}_2$ . The organic layer was washed with brine, and dried over anhydrous  $\text{Na}_2\text{SO}_4$ . After the solvent was evaporated in vacuo, the residue was purified by column chromatography on 100–200 mesh silica gel to afford pure methyl 3-(dimethylamino)-3-oxopropanoate.

Methyl 3-(dimethylamino)-3-oxopropanoate (726 mg, 5 mmol, 1 equiv) and Lawesson's reagent (1.1 g, 2.75 mmol, 0.55 equiv) were suspended in 40 mL of anhydrous THF under an atmosphere of  $\text{N}_2$ . The mixture was stirred sufficiently at ambient temperature until the reaction was completed as judged by TLC. The reaction was concentrated in vacuo, the residue was purified by column chromatography on 100–200 mesh silica gel to afford pure methyl 3-(dimethylamino)-3-thioxopropanoate **1f**.

For the spectral analysis of **1f**, see; L. K. Ransborg, Ł. Albrecht, C. F. Weise, J. R. Bak and K. A. Jørgensen, *Org. Lett.*, 2012, **14**, 724;

**1h~1k**, **1n~1p** were all synthesized using this general procedure.

## 2. General procedure for the preparation of polysubstituted 2-aminothiophenes **3**.

Thioamide compounds **1** (0.2 mmol) and **2** (0.24 mmol) were added to a solution of  $\text{Cu}(\text{OAc})_2$  (0.02 mmol) in dry DMA (2 mL) under air atmosphere. The resulting mixture was stirred at 80 °C until the

reaction was completed as judged by TLC. After cooling to room temperature, the solvent was diluted with water and extracted with ethyl acetate. The ethyl acetate layer was washed with brine, and dried over anhydrous Na<sub>2</sub>SO<sub>4</sub>. After the solvent was evaporated in vacuo, the residue was purified by column chromatography on 100–200 mesh silica gel to afford pure 2-aminothiophene compounds **3**.

### References:

1. Q. Liu and T. Rovis, *Org. Lett.*, 2009, **11**, 2856.
2. L. K. Ransborg, L. Albrecht, C. F. Weise, J. R. Bak and K. A. Jørgensen, *Org. Lett.*, 2012, **14**, 724;
3. Y.-L. Zhang, J.-M. Xiao, J.-L. Feng, K.-W. Yang, L. Feng, L.-S. Zhou, M. W. Crowder, *Bioorg. Med. Chem. Lett.*, 2013, **23**, 1676.
4. S. Bhunia, S. Ghosh, D. Dey and A. Bisai, *Org. Lett.*, 2013, **15**, 2426.
5. M.-H. Kim, S.-H. Choi, Y.-J. Lee, J. Lee, K. Nahm, B.-S. Jeong, H.-G. Park and S.-S. Jew, *Chem. Commun.*, 2009, 782.

3116.6527  
3109.4103  
3024.5427  
3017.1803  
3009.7779  
2977.1273  
2969.4048  
2961.8424  
2904.9039

1516.8529

1392.5325

1159.5368

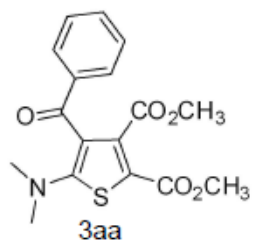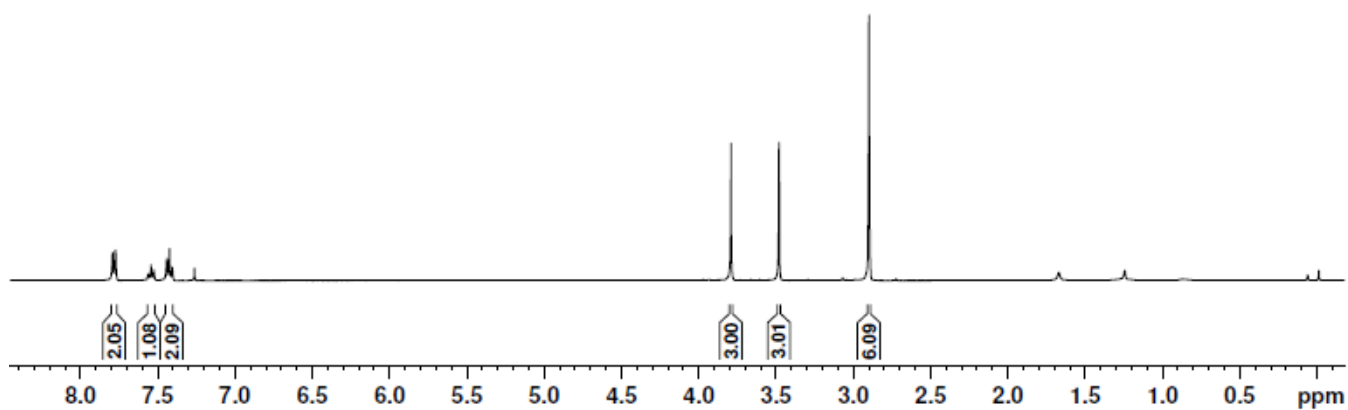

190.80

165.77

165.19

161.37

141.52

138.46

132.98

129.50

128.35

117.04

111.69

77.37

77.05

76.73

52.40

52.19

45.02

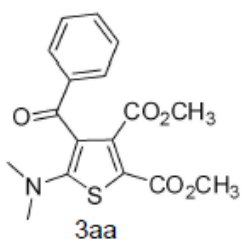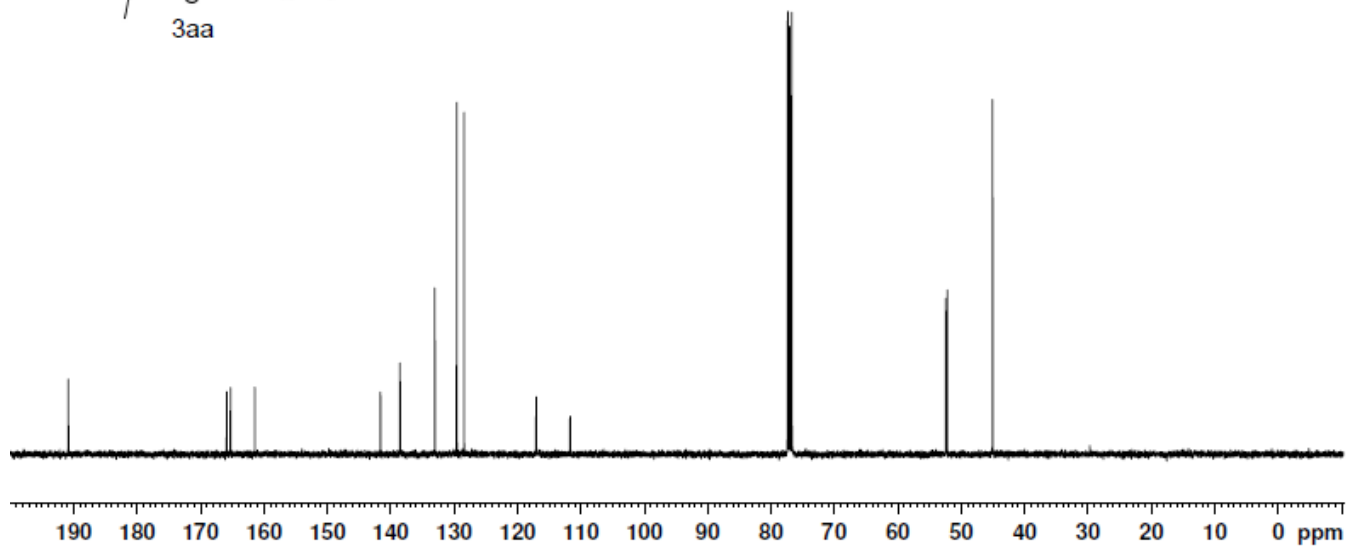

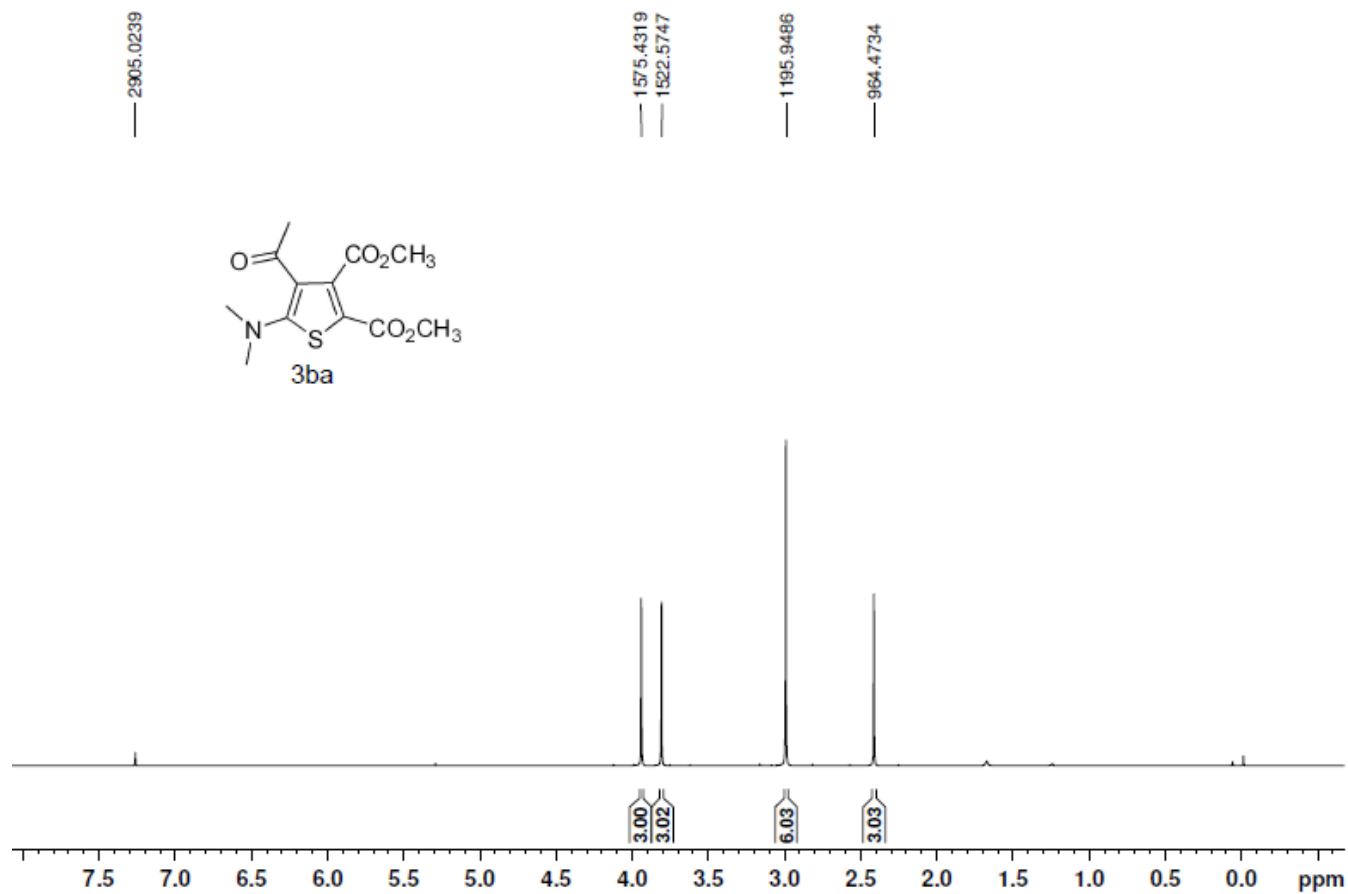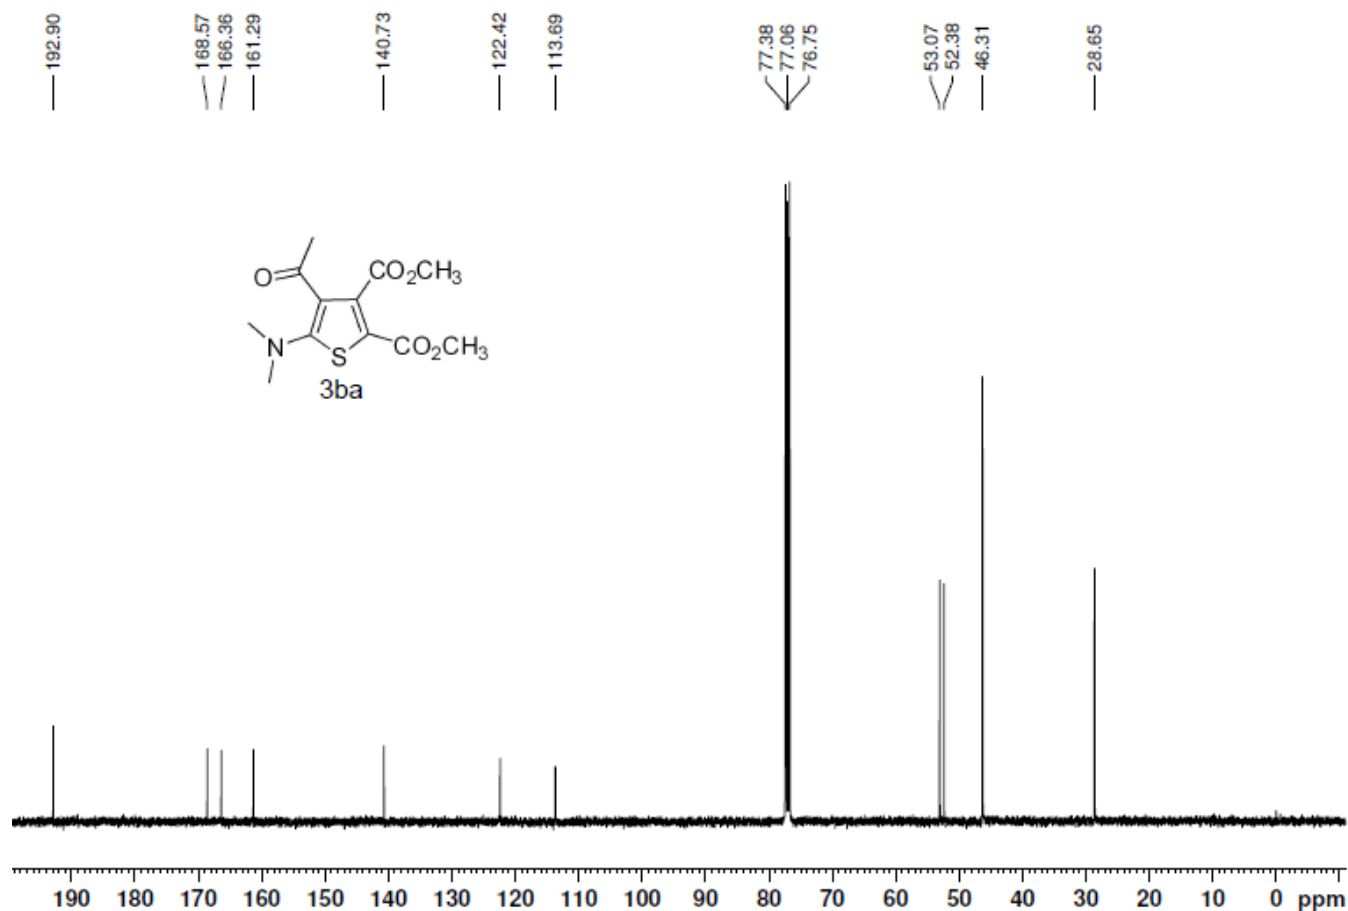

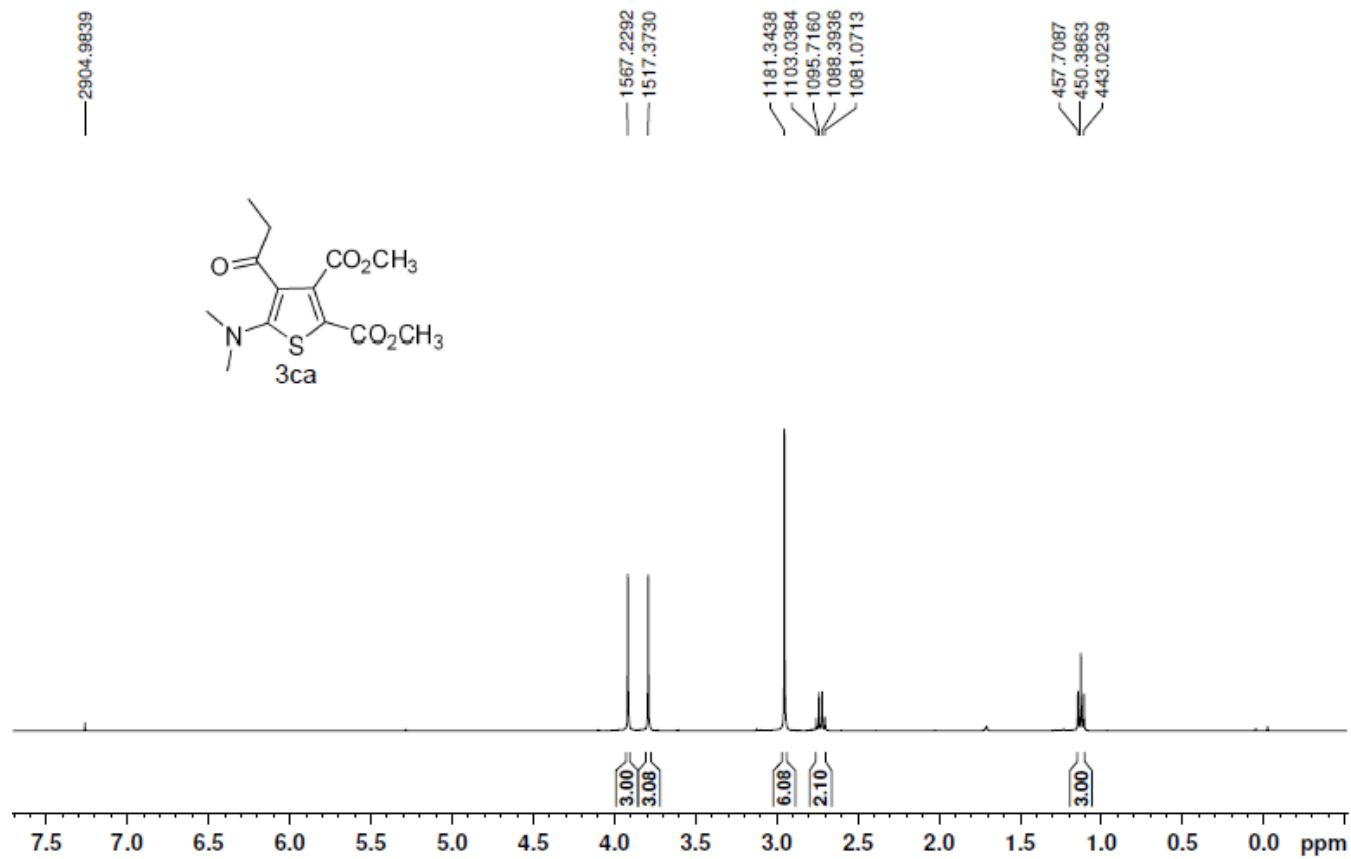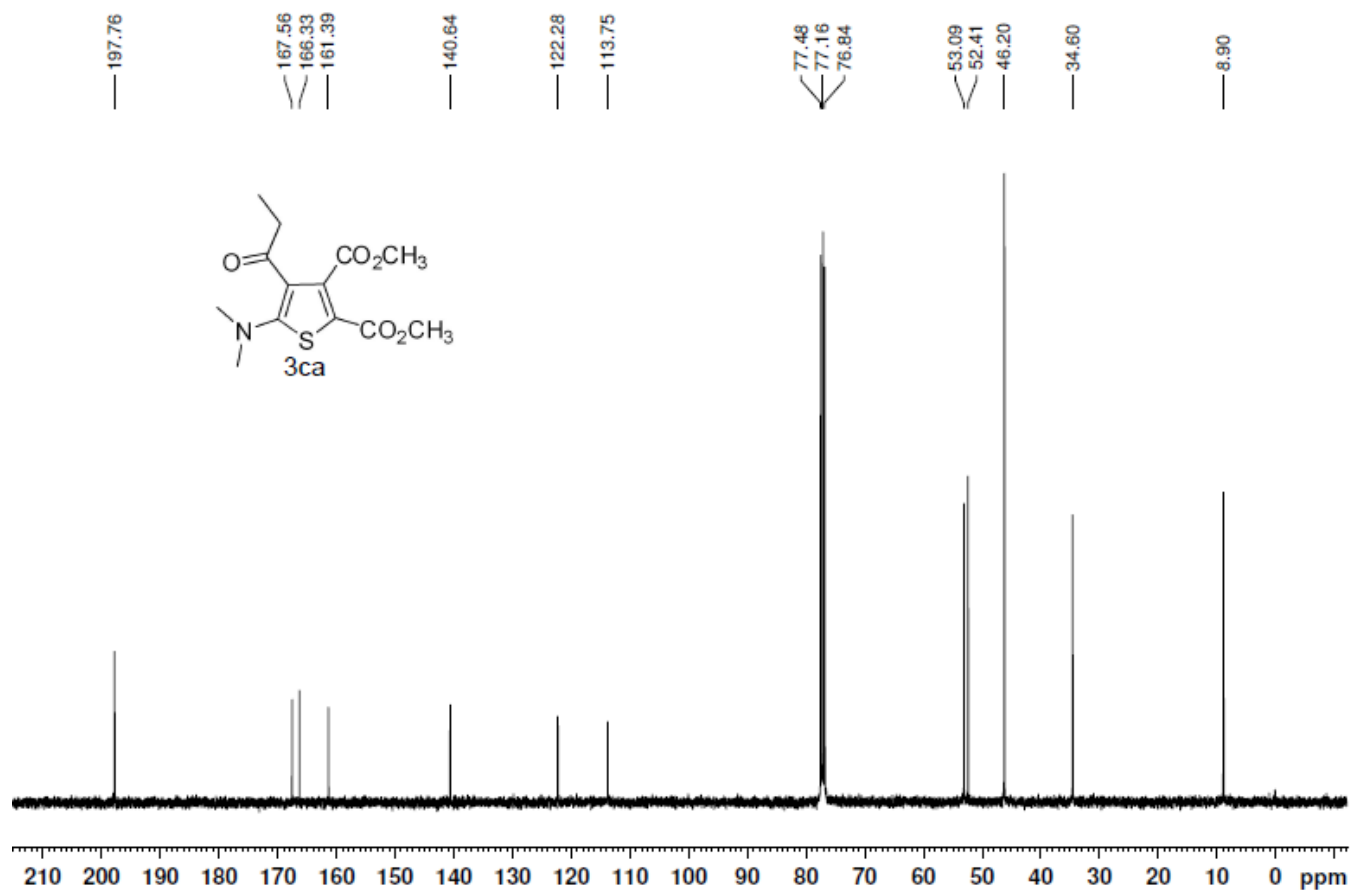

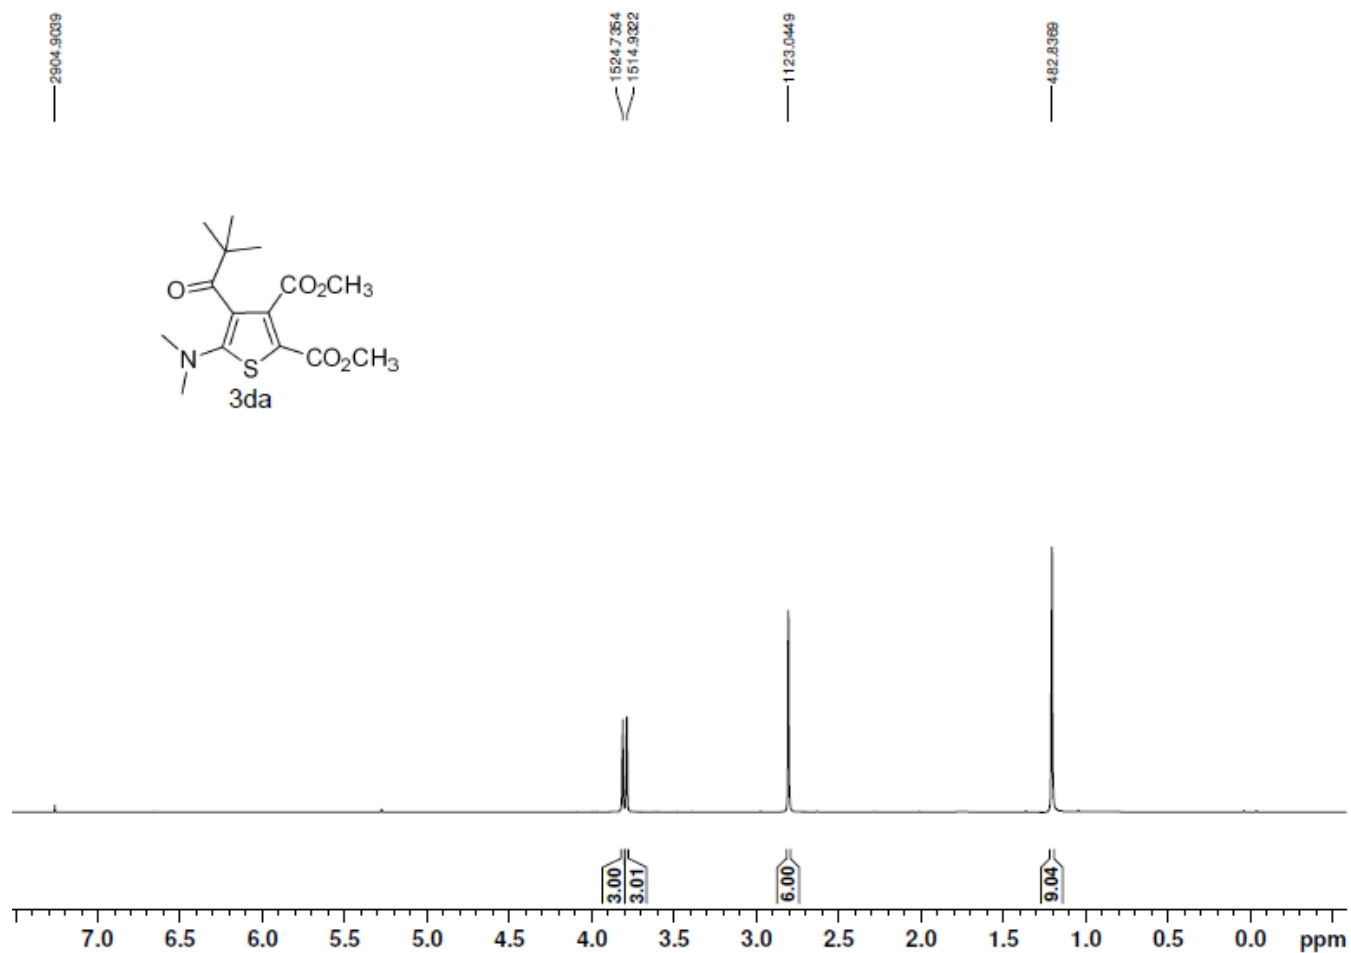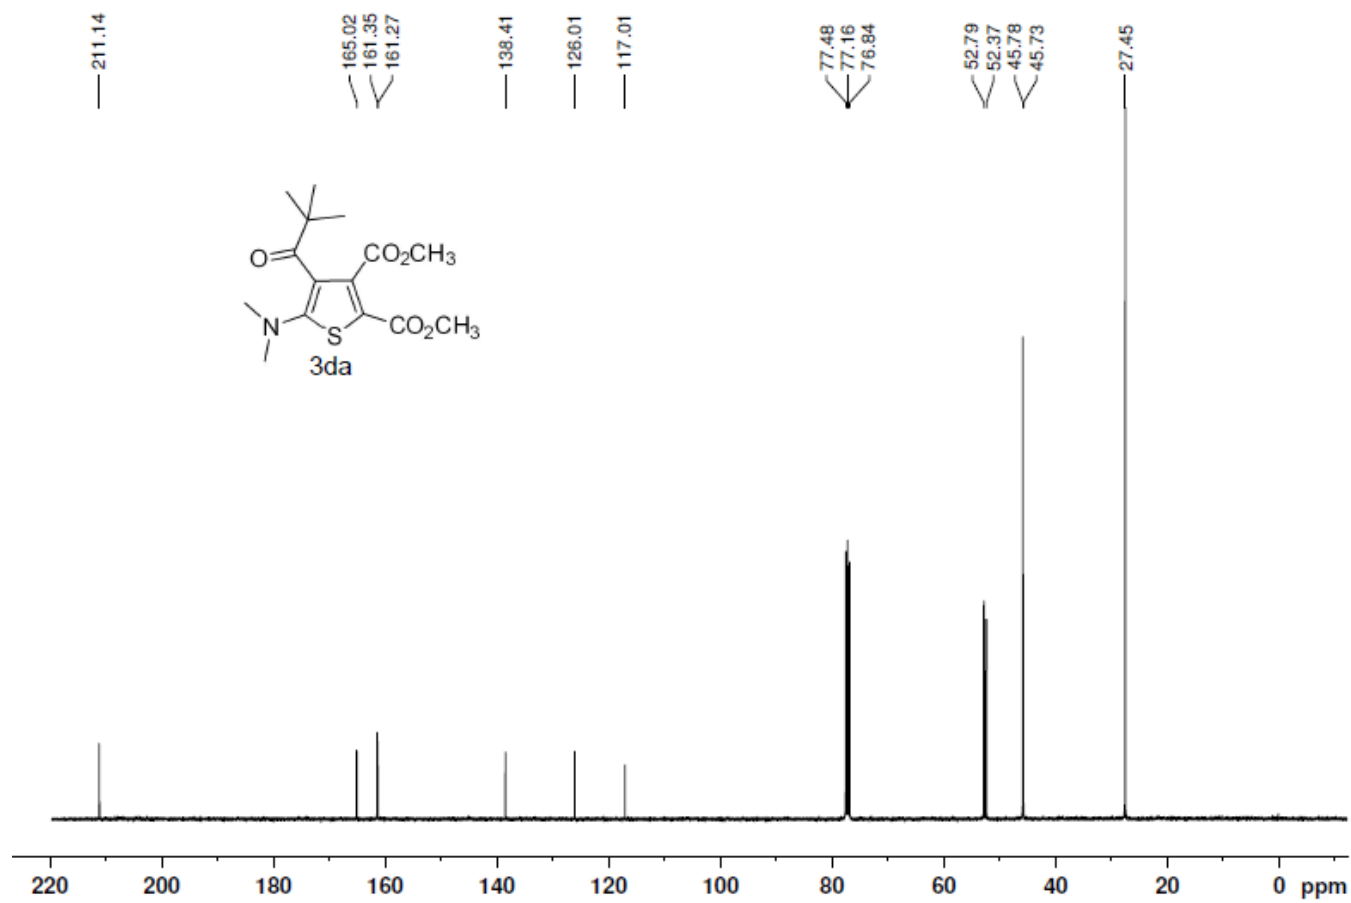

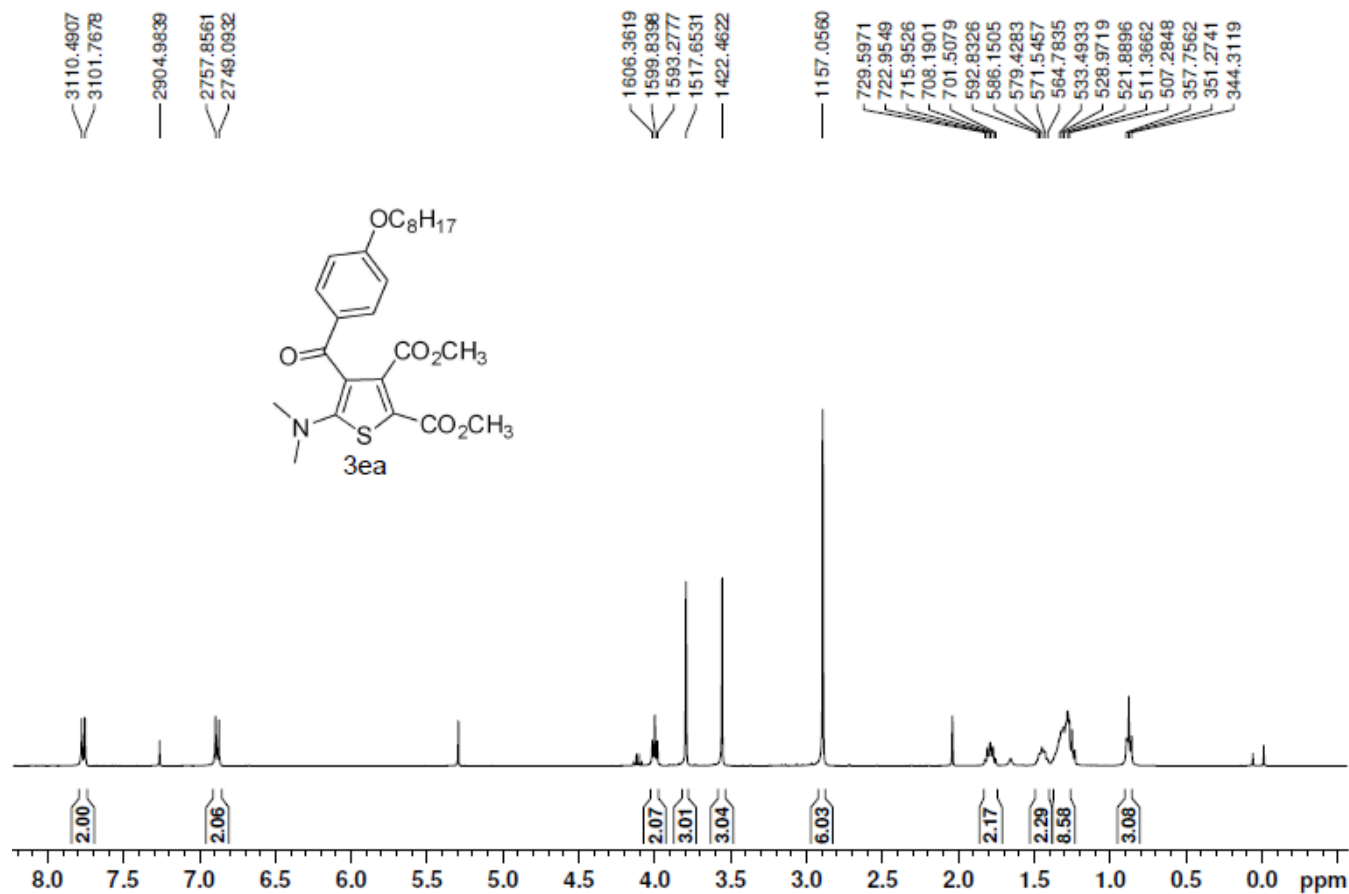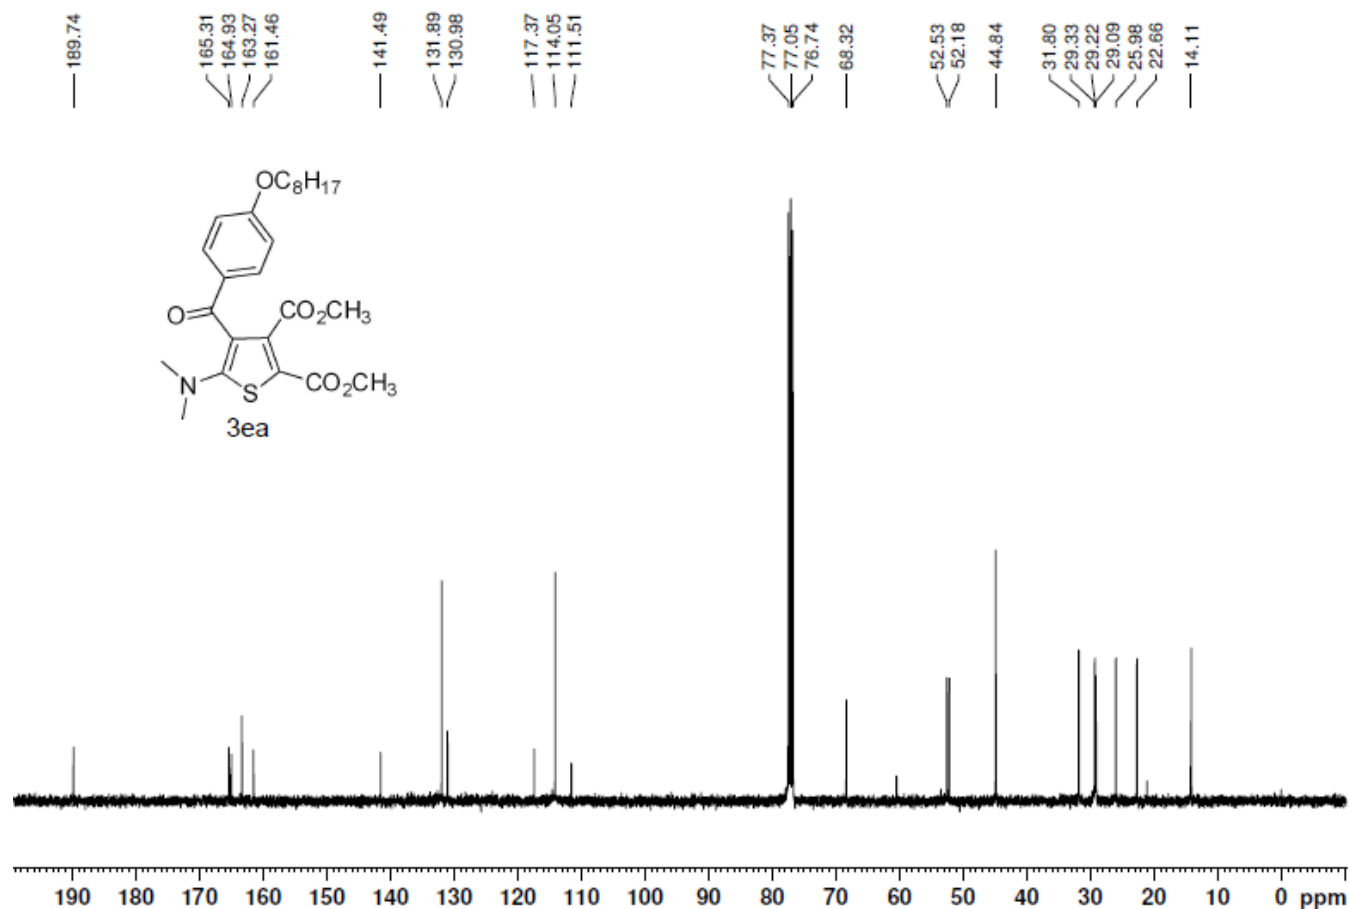



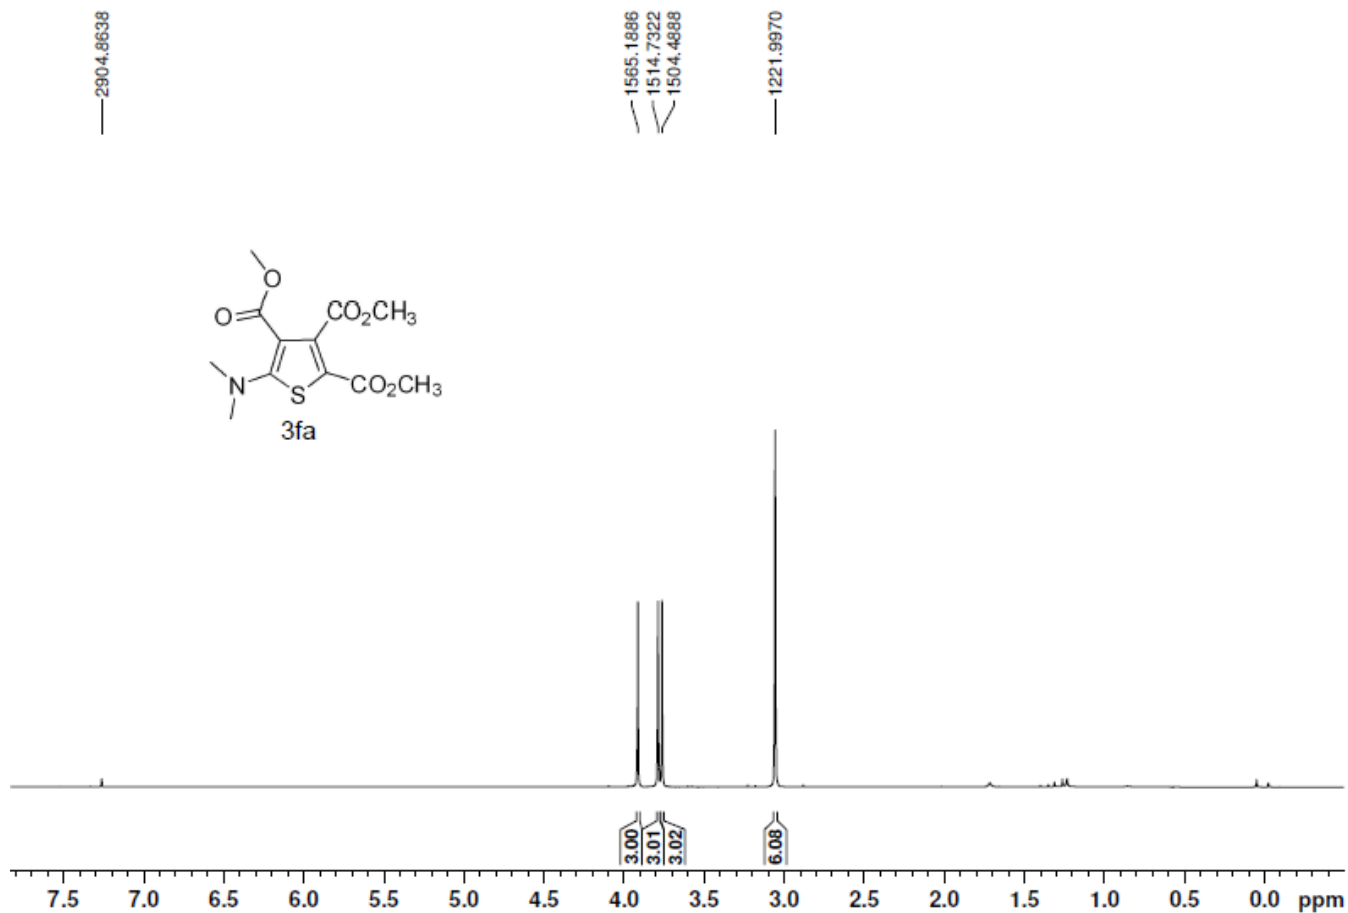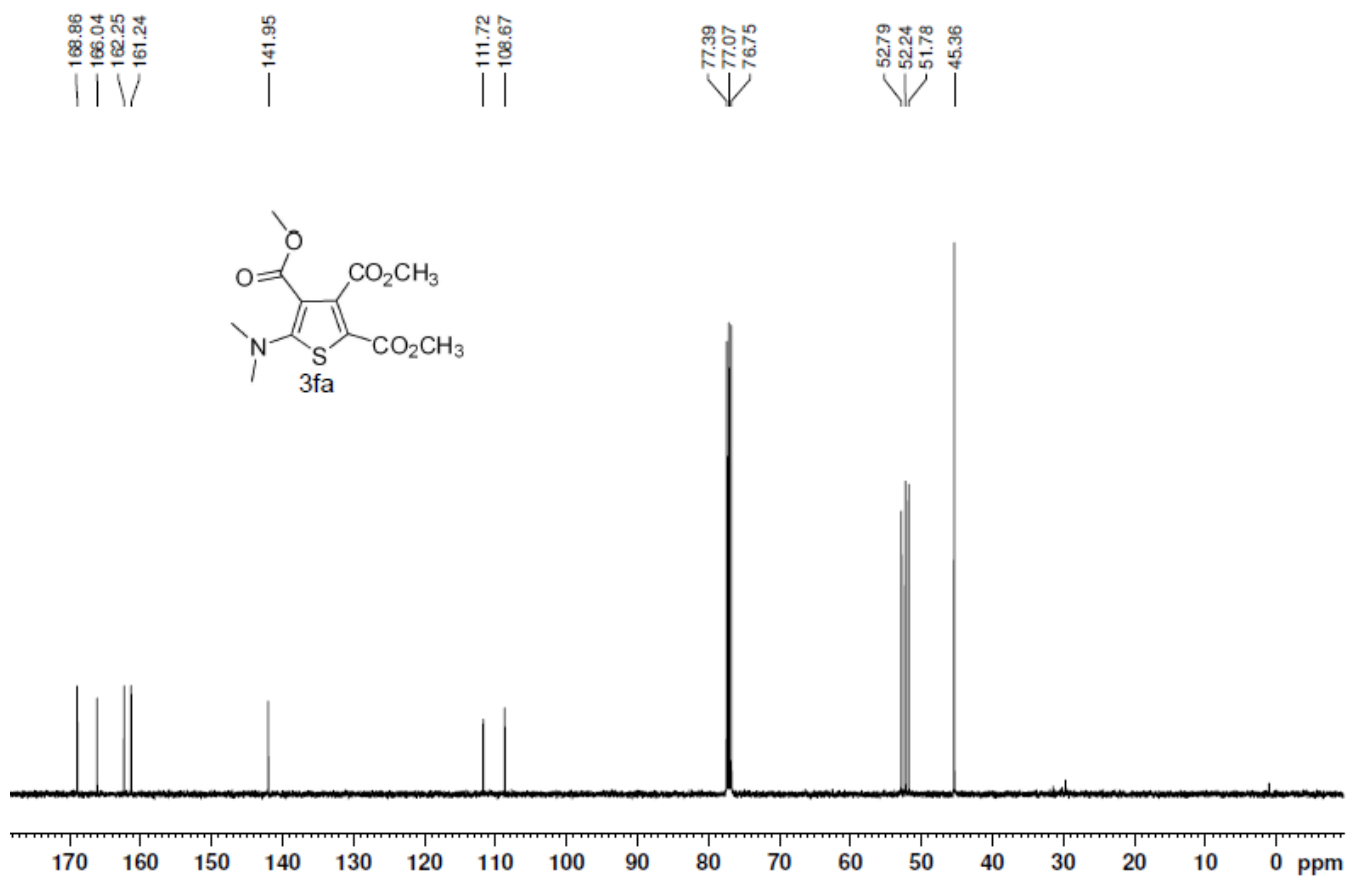

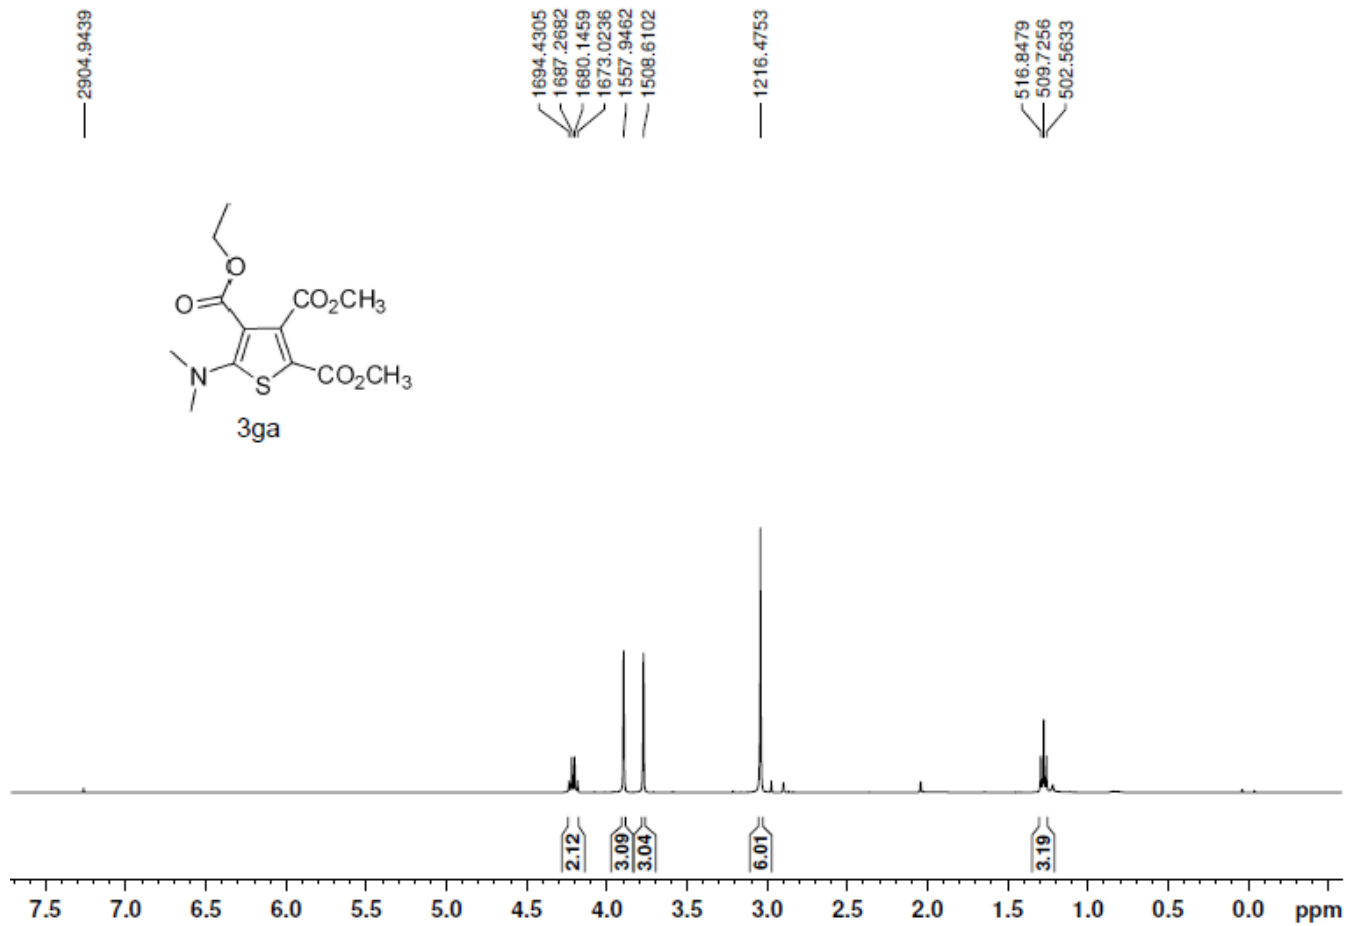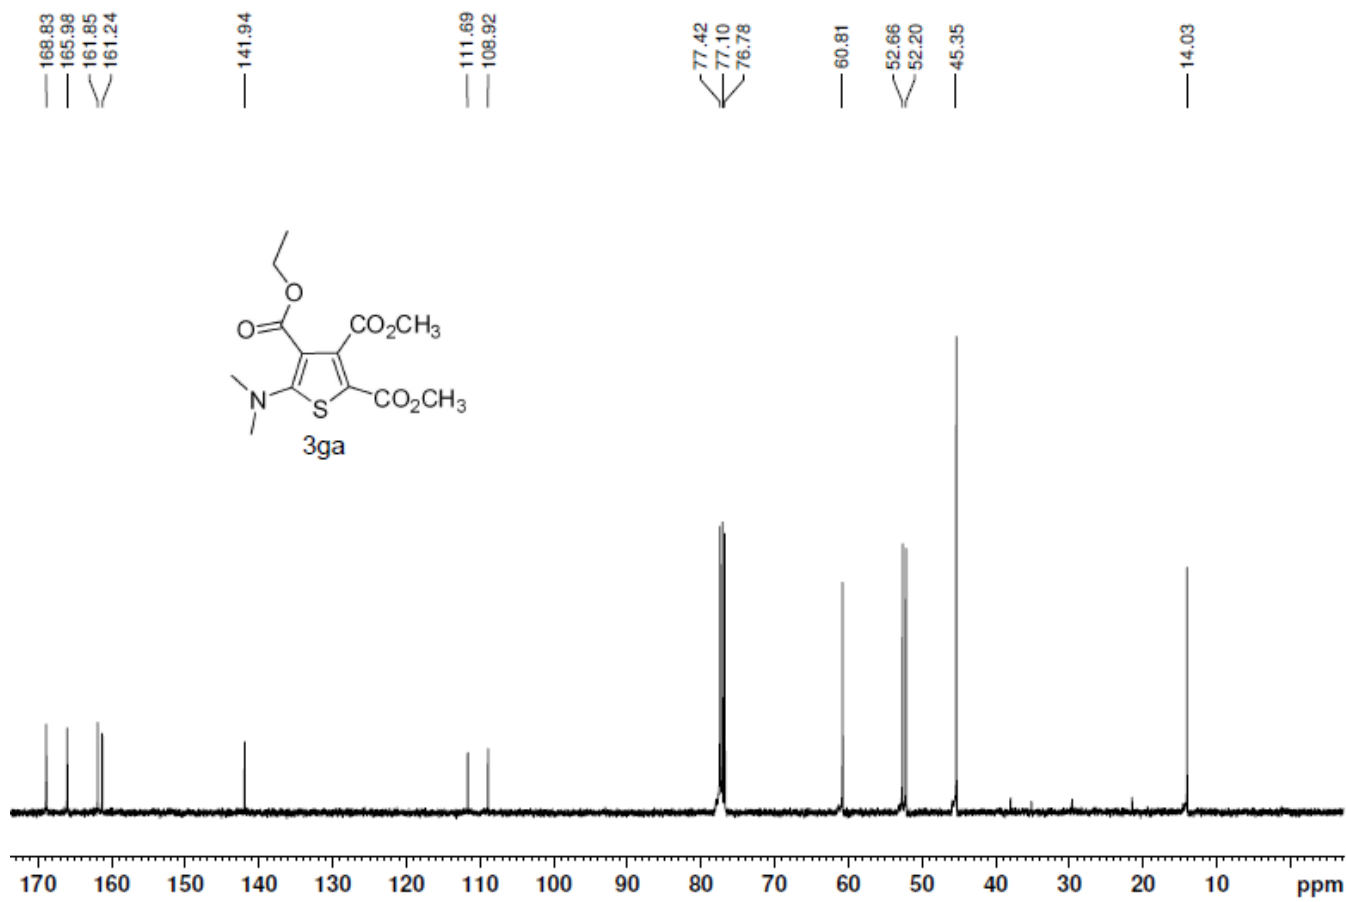

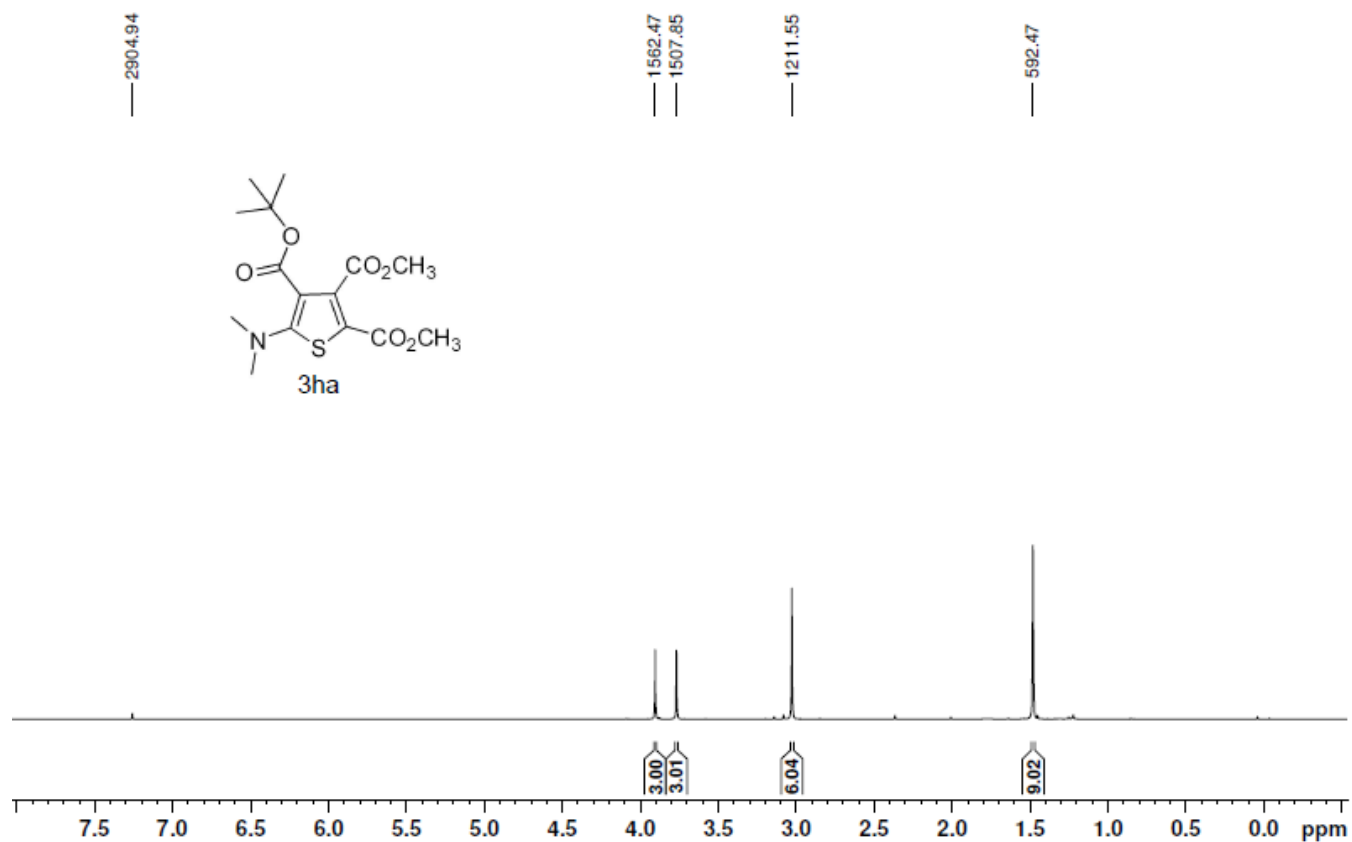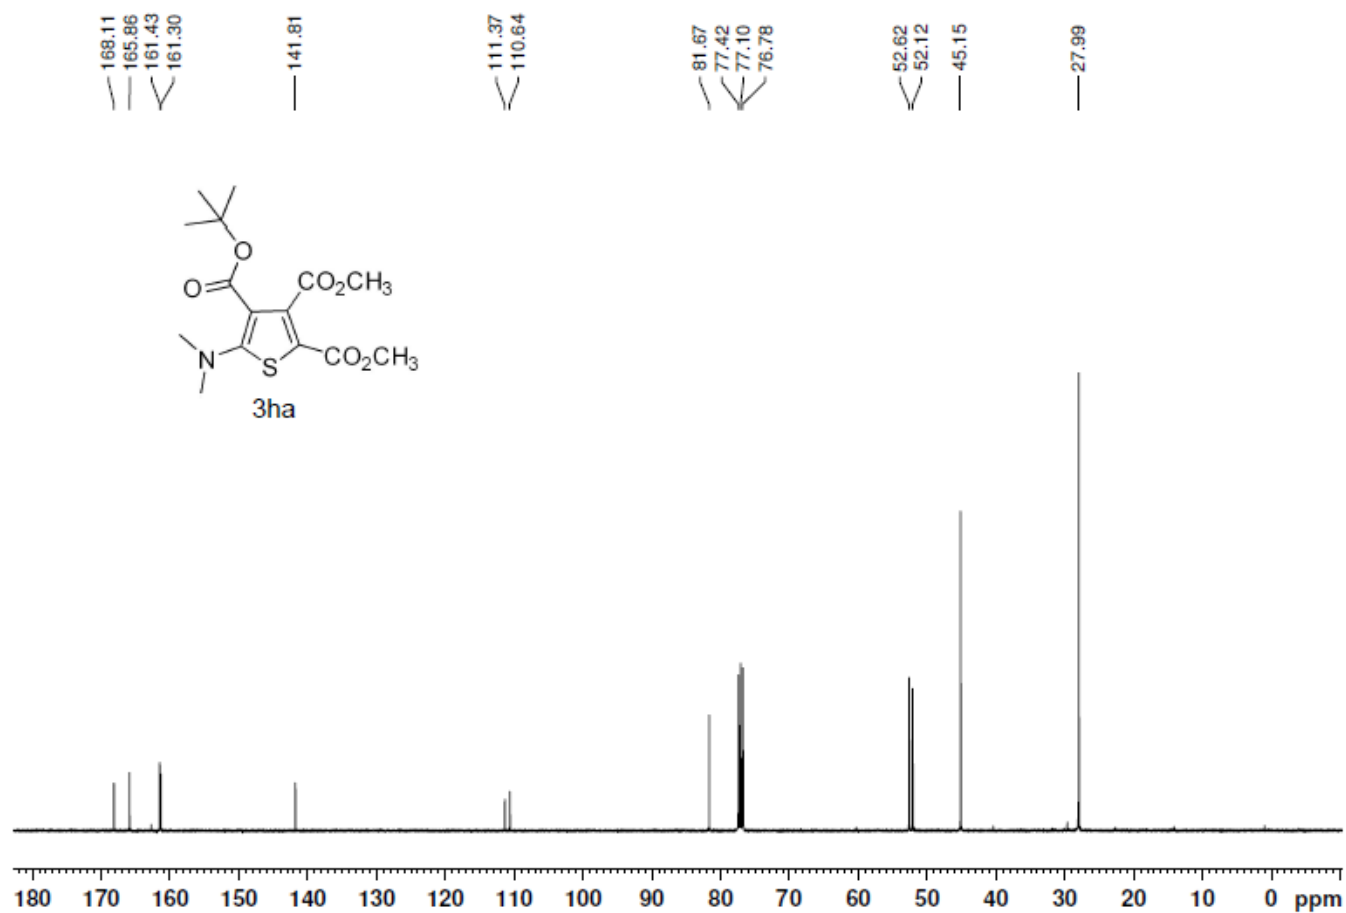

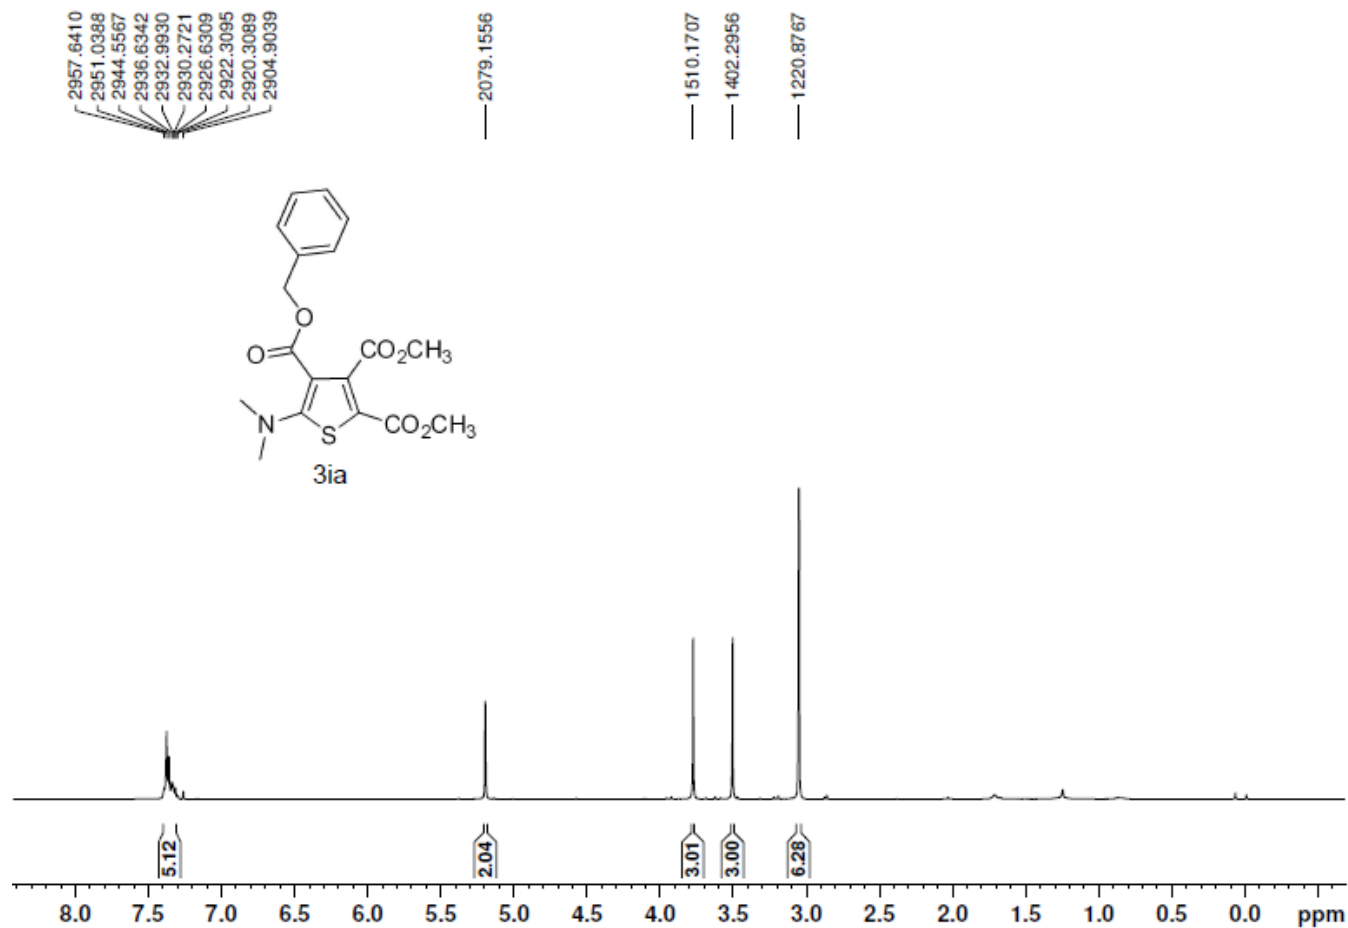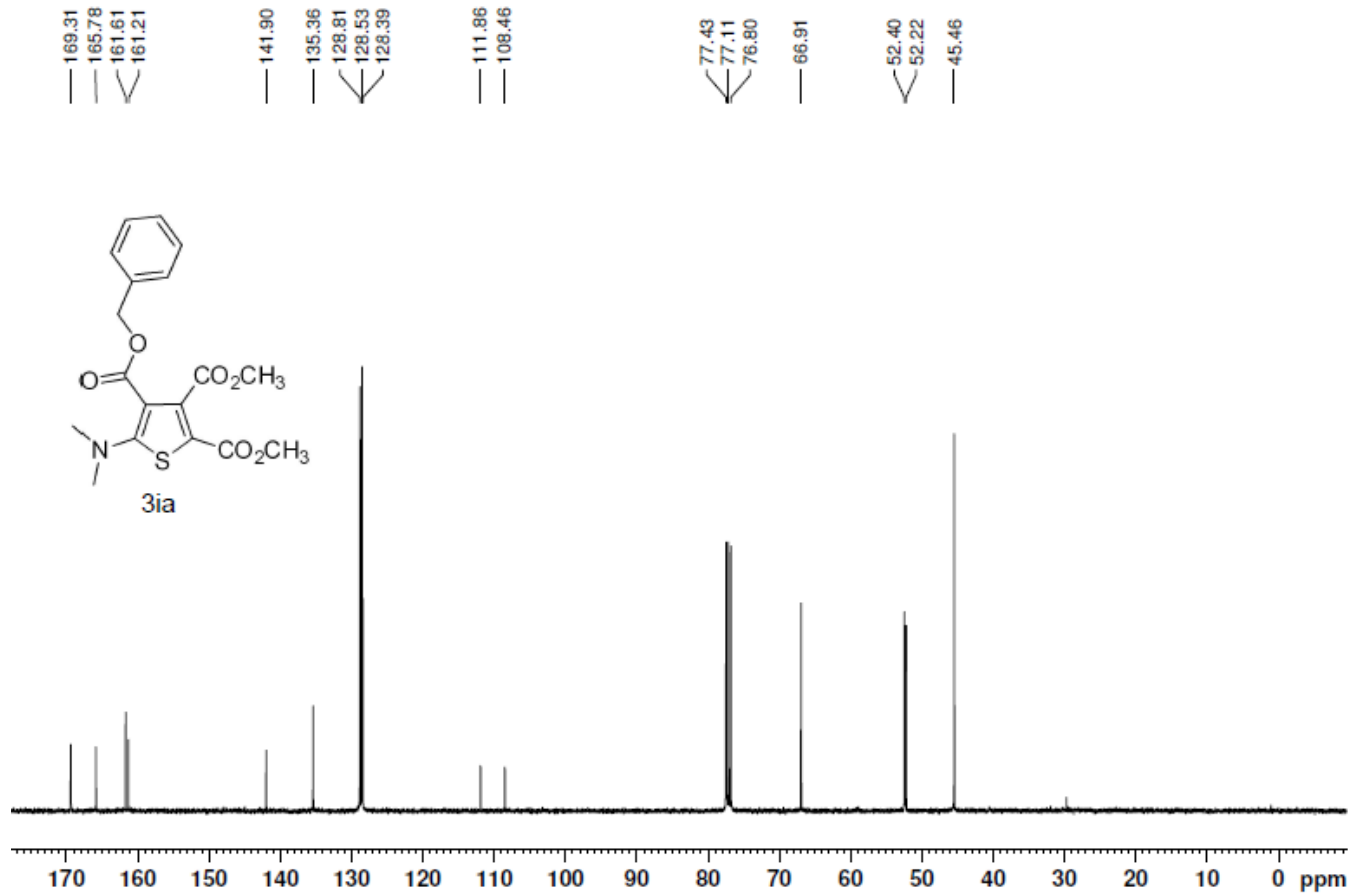

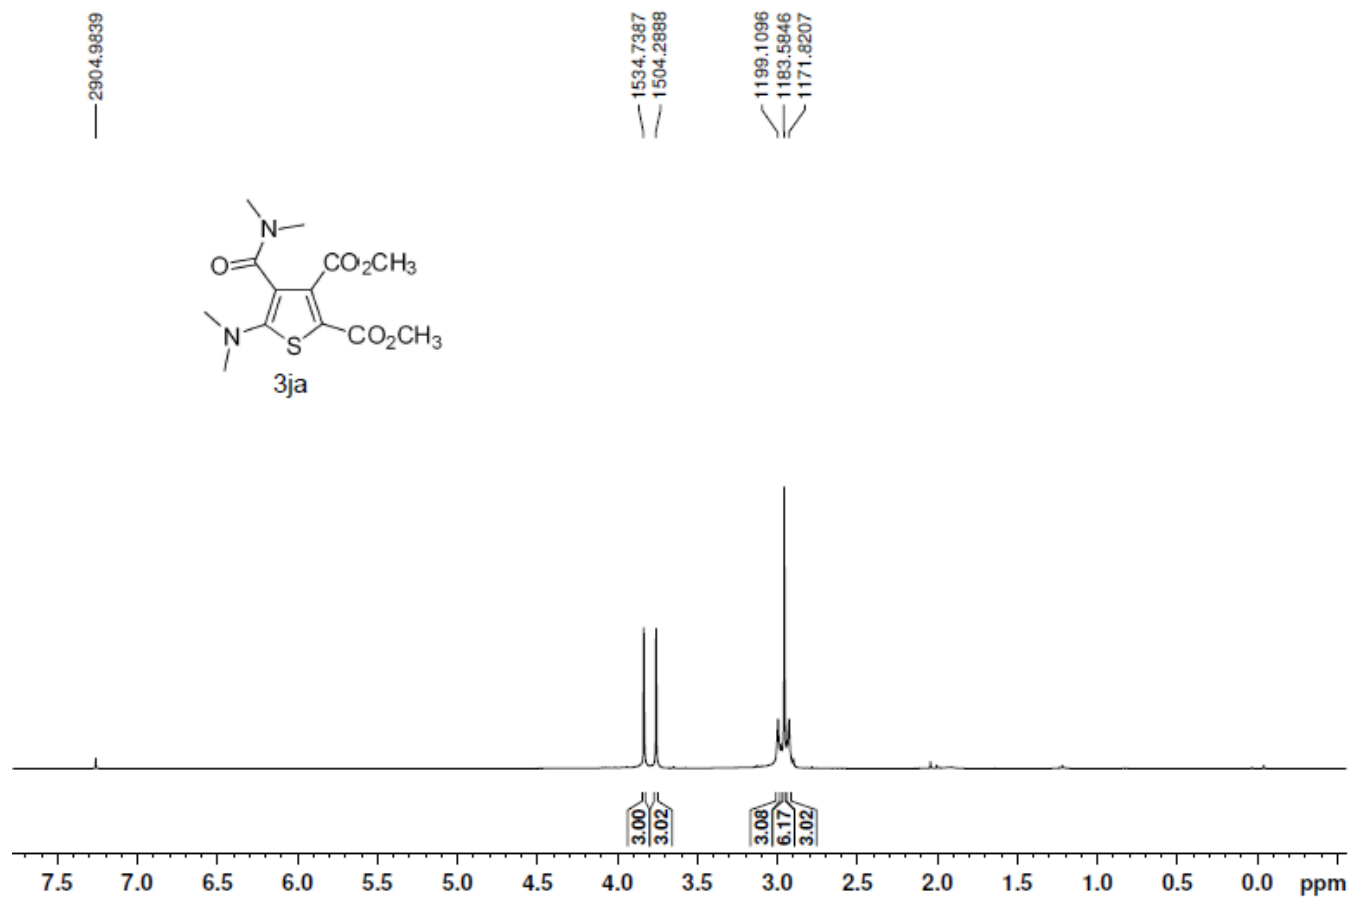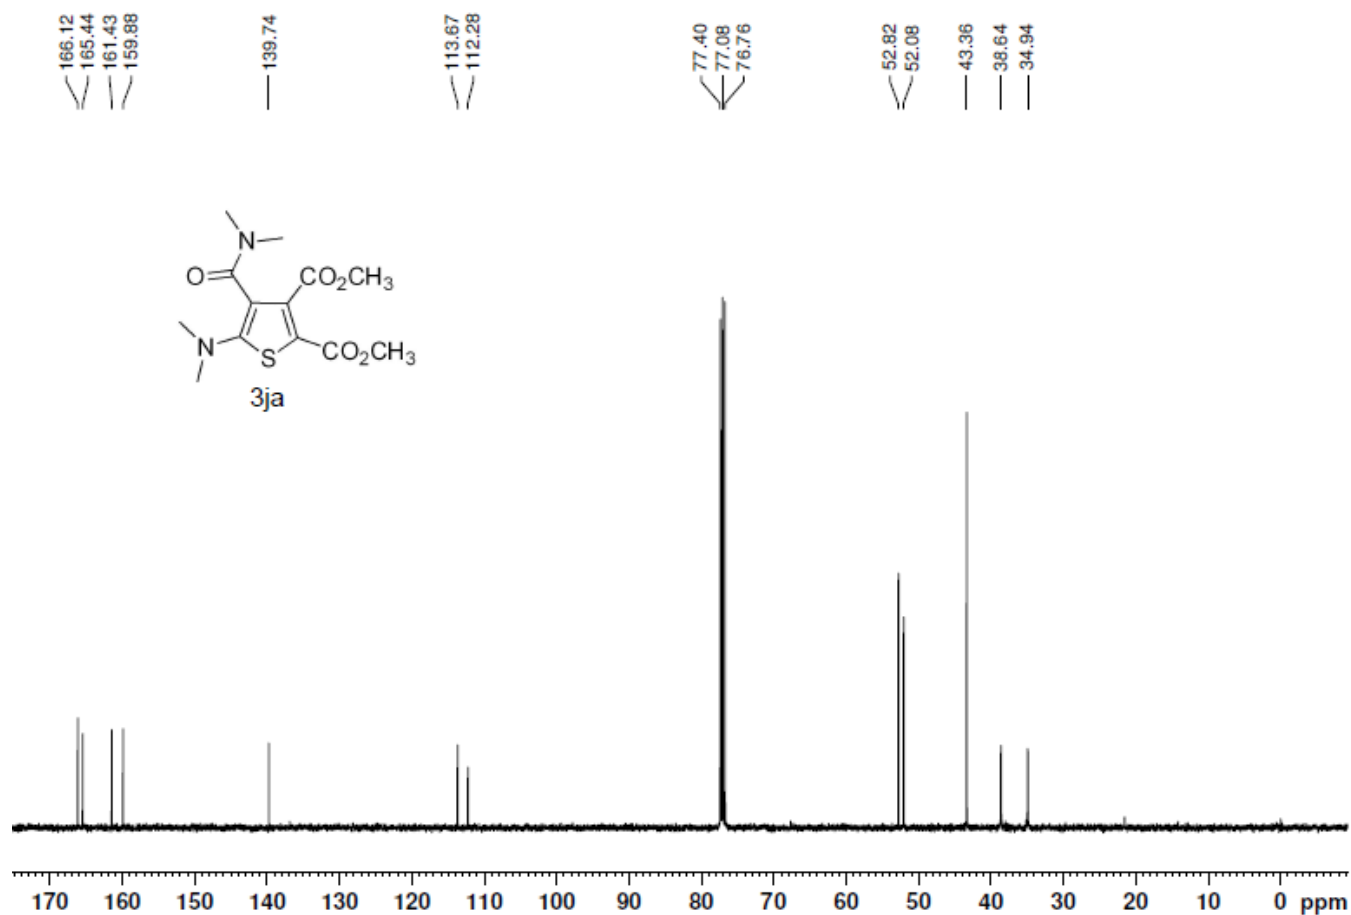

— 2904.9039

— 1536.7793  
— 1515.5324  
— 1405.0165  
— 1296.6613  
— 1194.3881

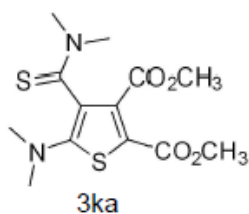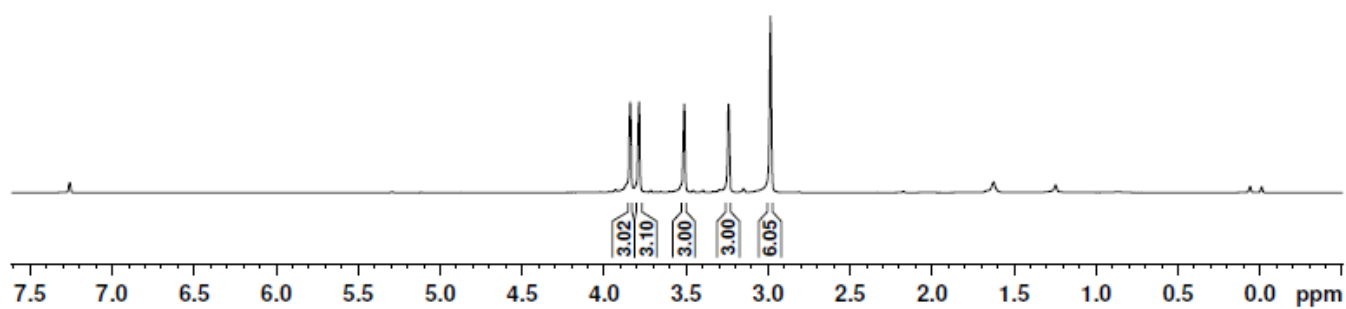

— 193.52

— 165.53  
— 161.41  
— 156.79

— 139.72

— 121.22

— 112.92

— 77.36  
— 77.05  
— 76.73

— 52.74  
— 52.15  
— 43.48  
— 43.24  
— 42.78

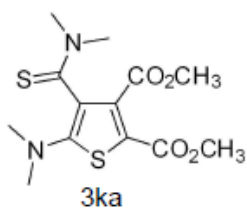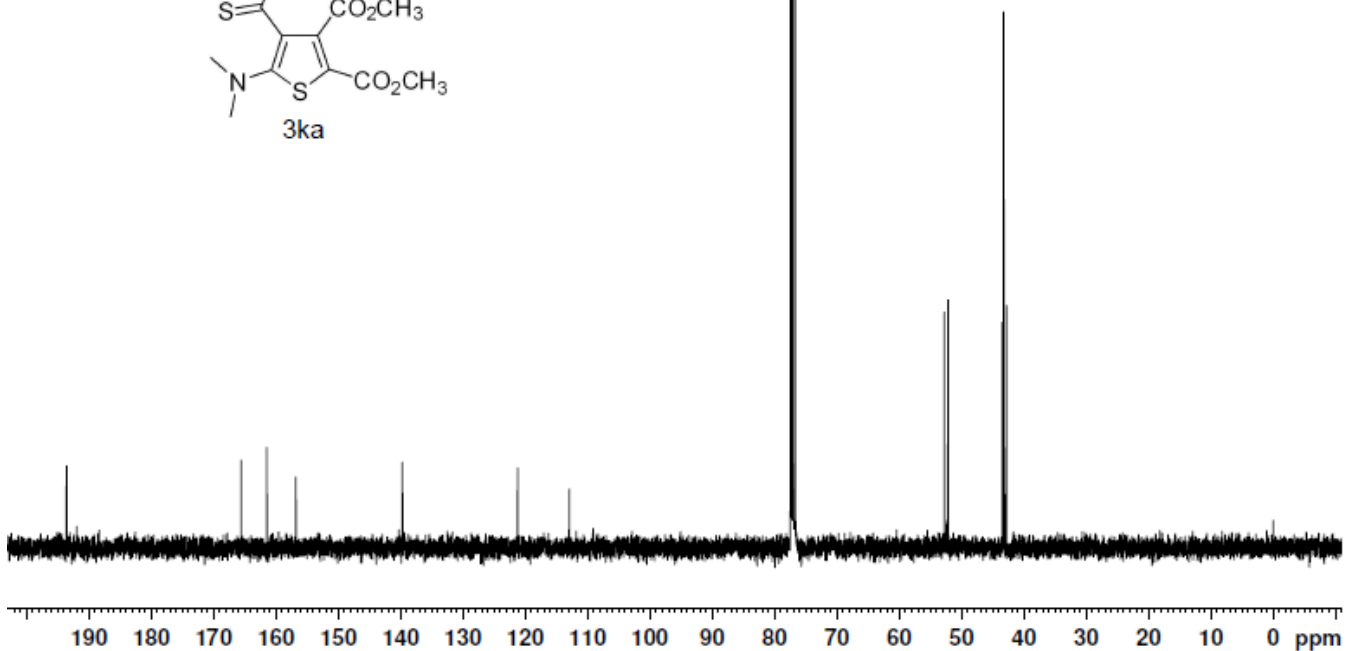

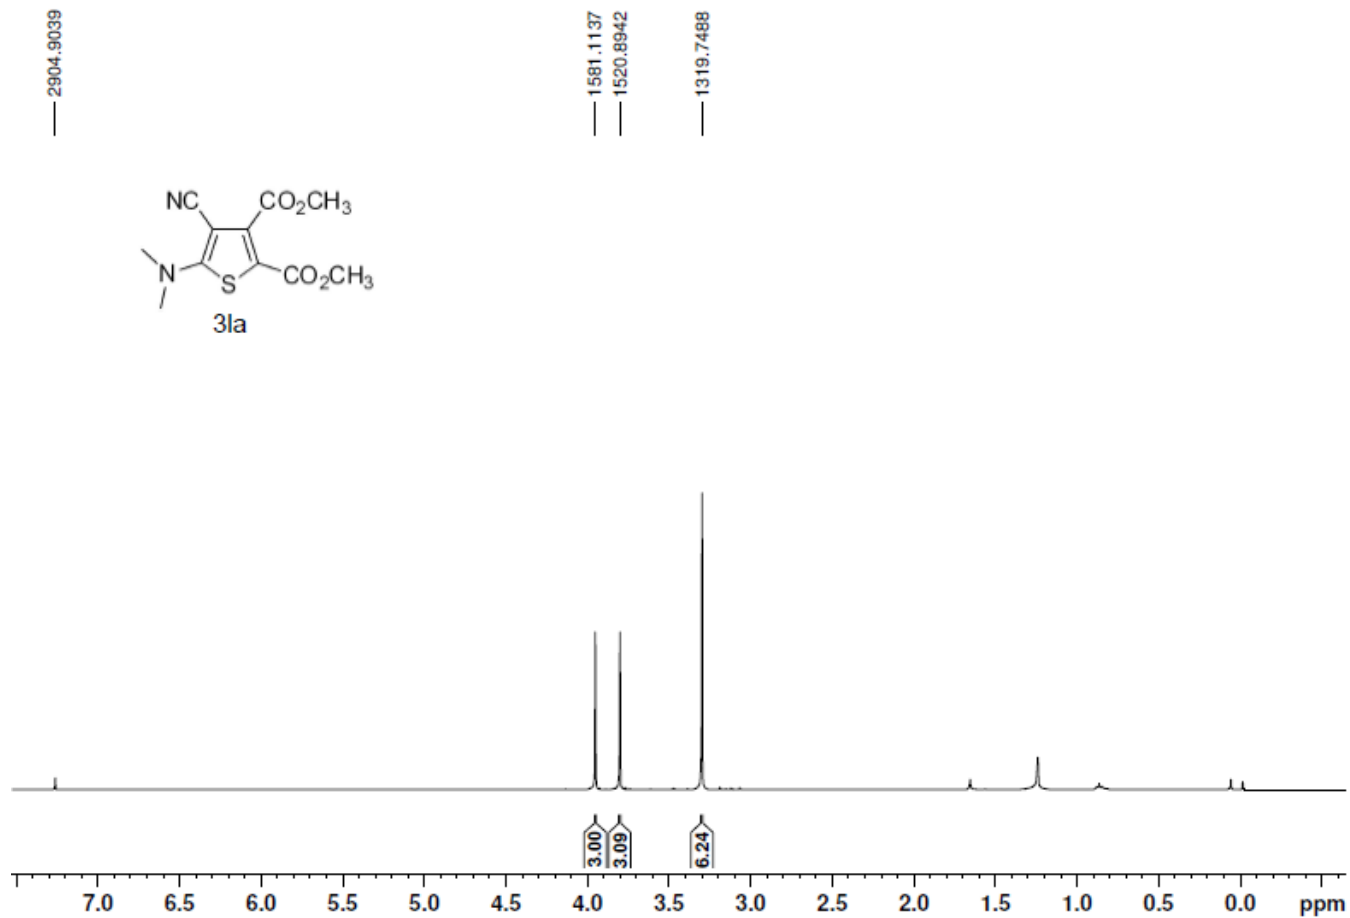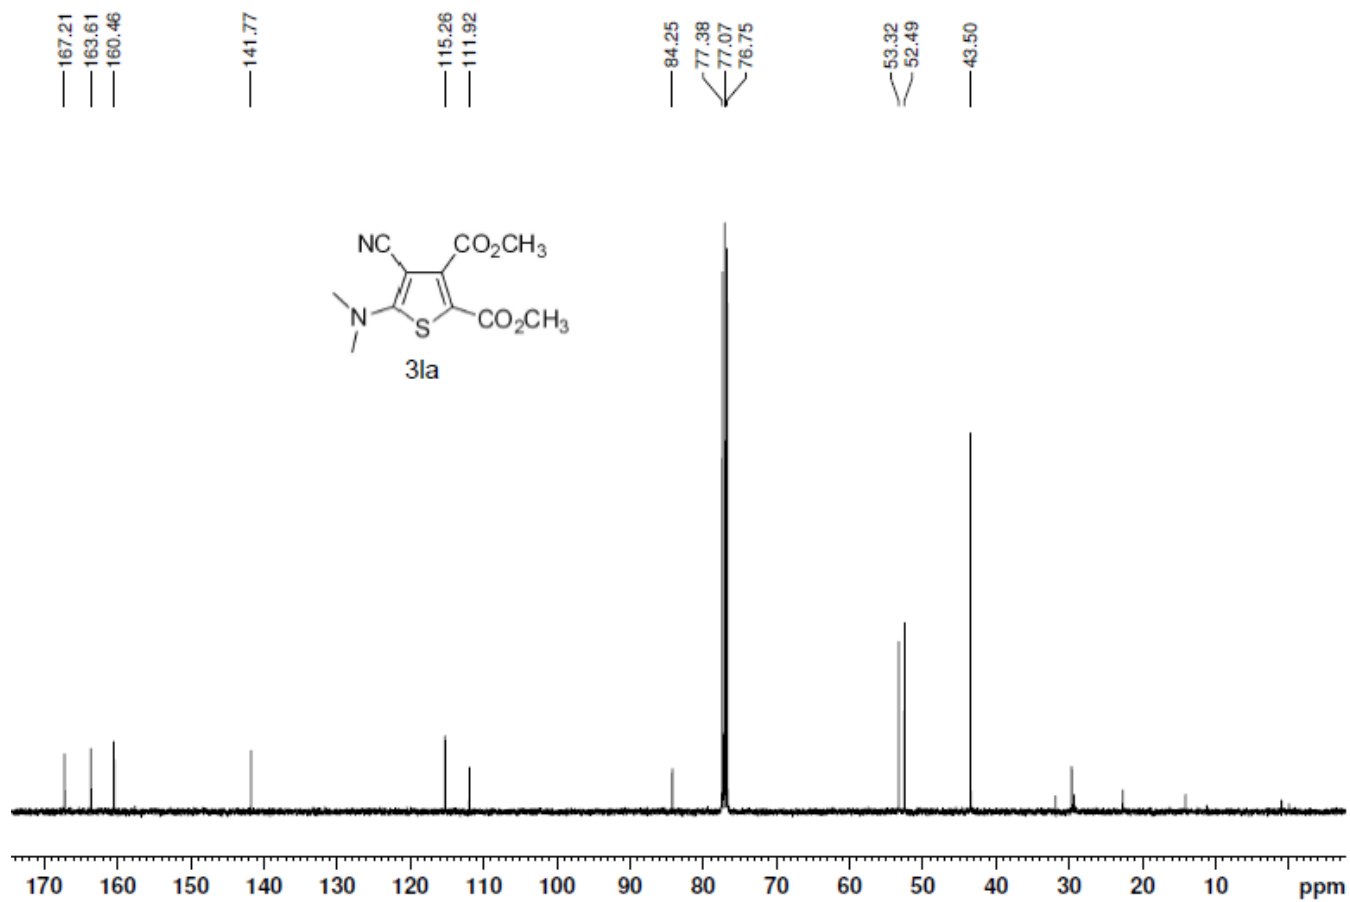

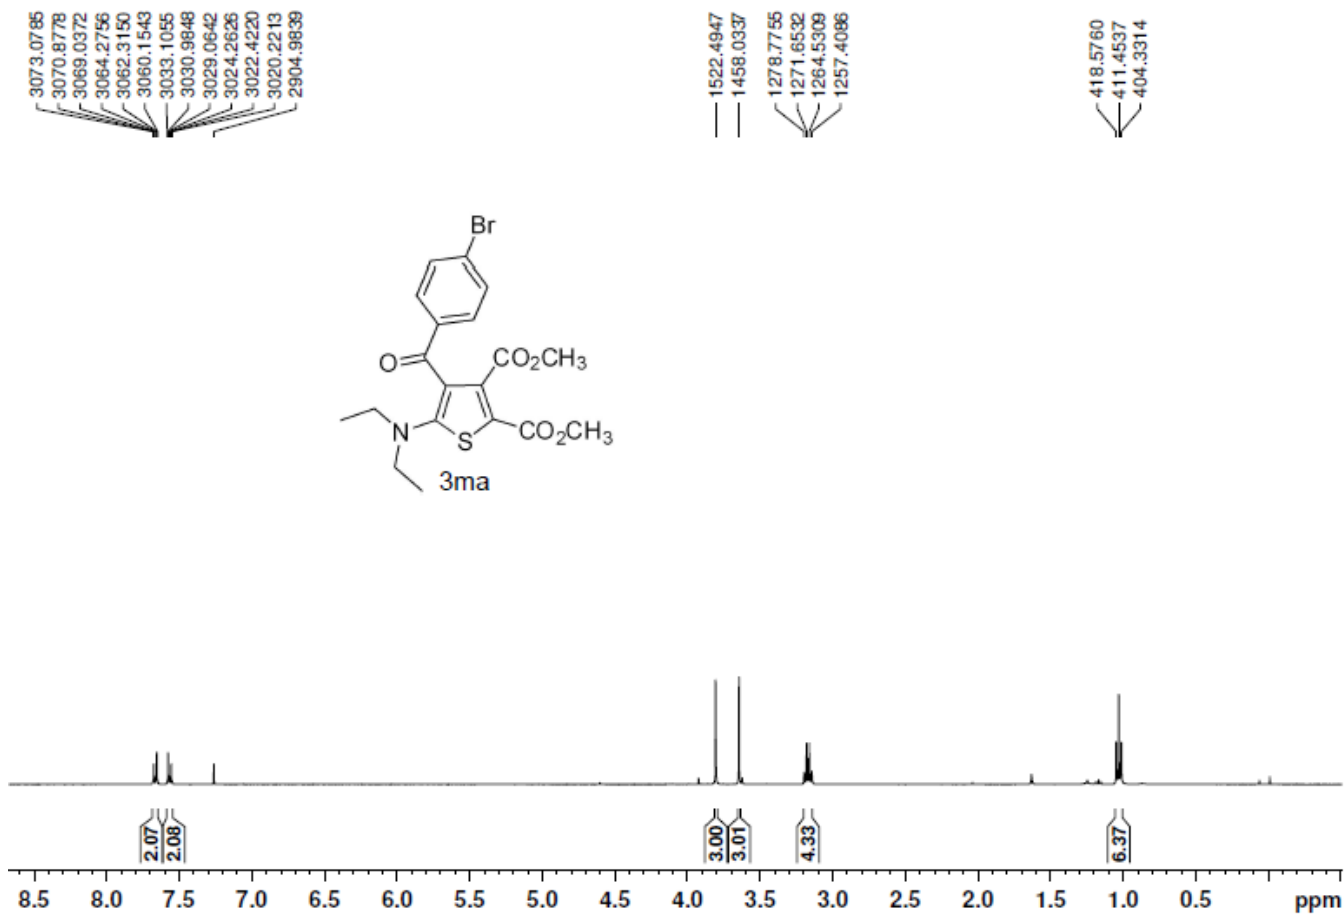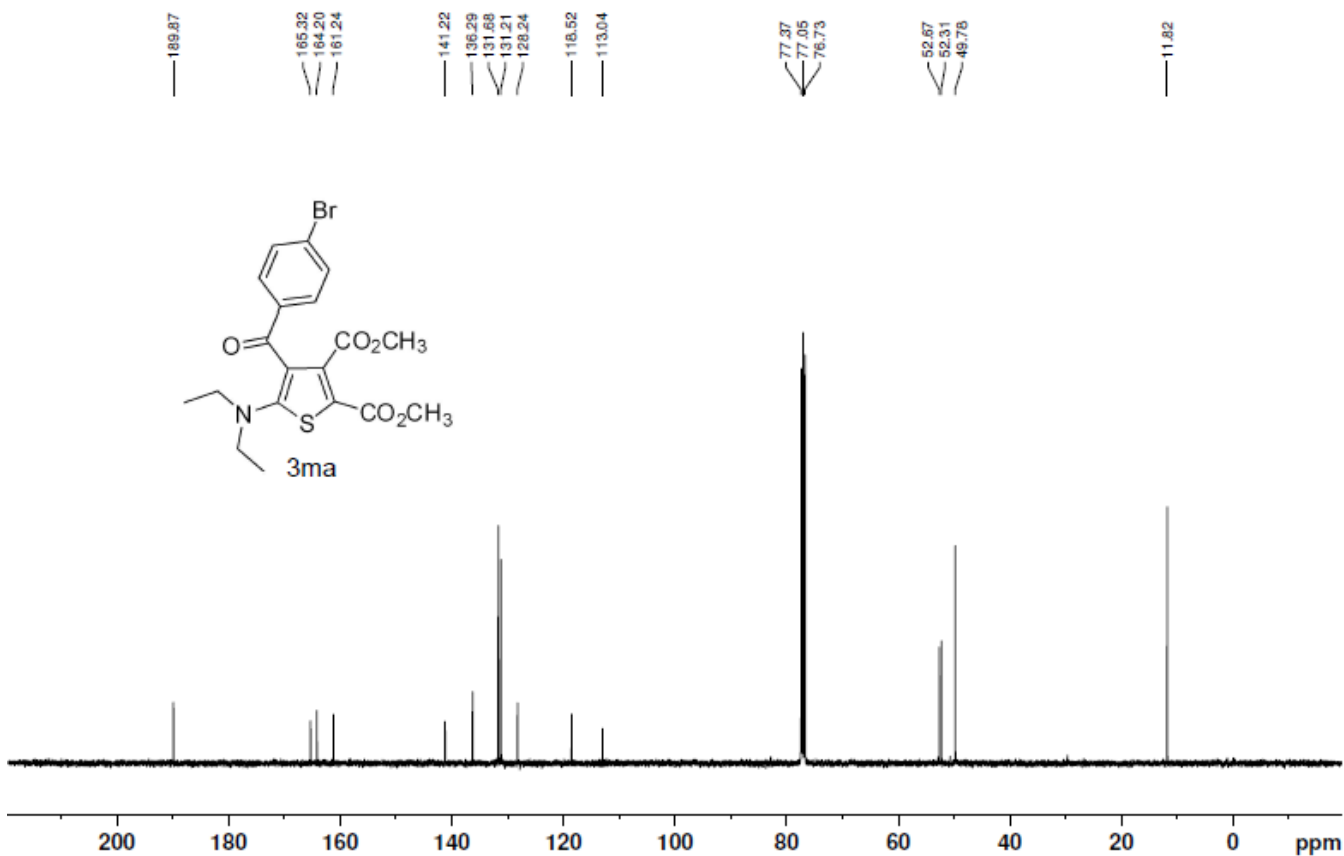



— 2904.9039

1567.5493  
1516.7728  
1503.4485  
1372.3659  
1365.2436  
1358.1213  
1350.9990

488.7188  
481.6365  
474.5142

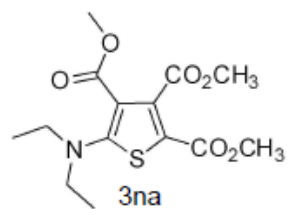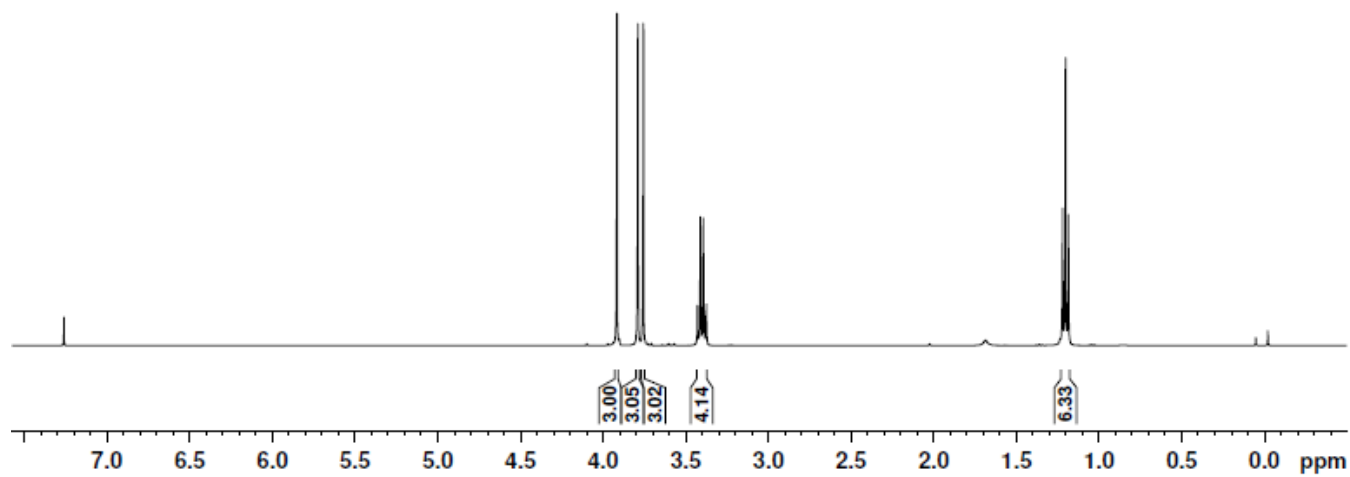

167.08  
166.23  
162.54  
161.27

141.84

111.98  
110.09

77.38  
77.06  
76.75

52.81  
52.26  
51.83  
49.70

12.17

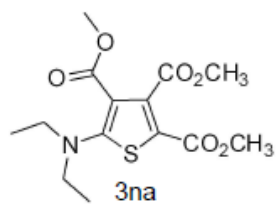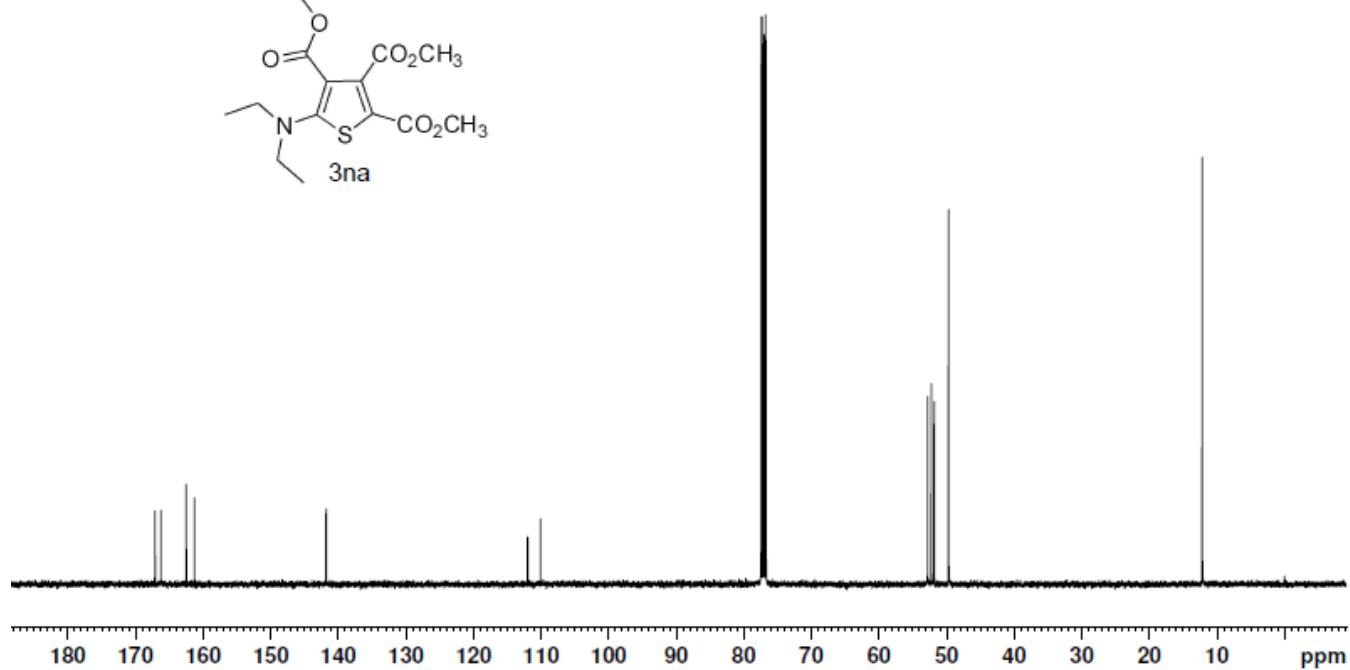

— 2904.9039

1563.4680  
1540.5405  
1535.9791  
1531.2175  
1519.5337  
1503.6085  
1309.5055  
1304.7839  
1300.1825

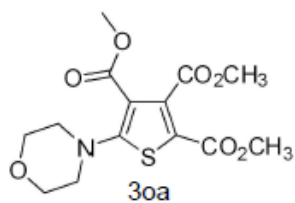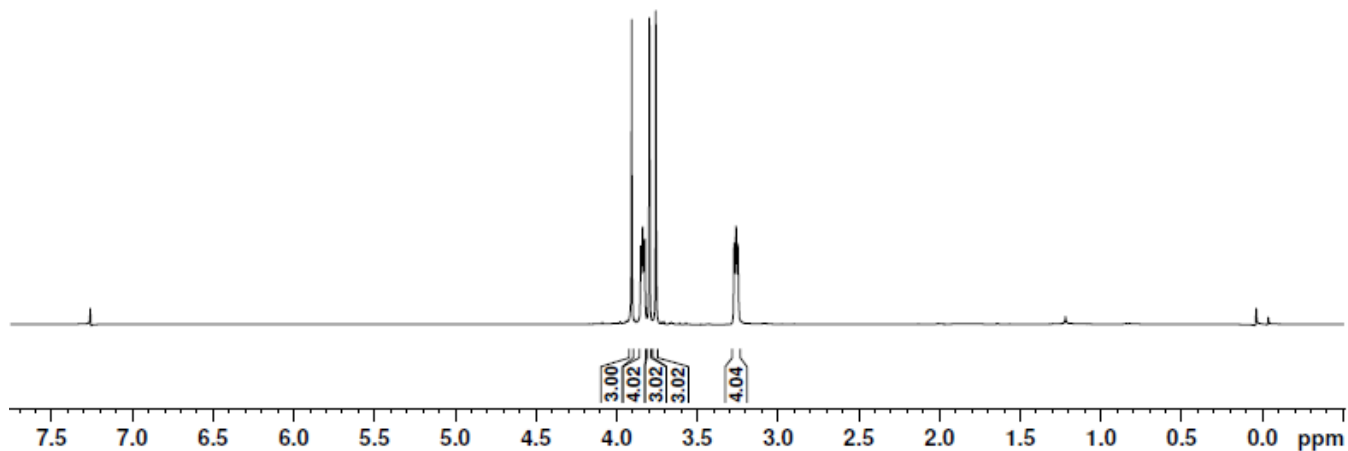

169.38  
166.80  
161.63  
160.90  
141.49  
115.39  
112.76  
77.43  
77.12  
76.80  
66.05  
53.38  
52.87  
52.46  
51.94

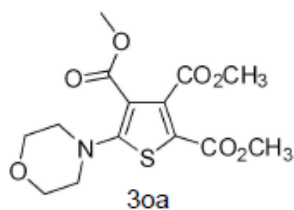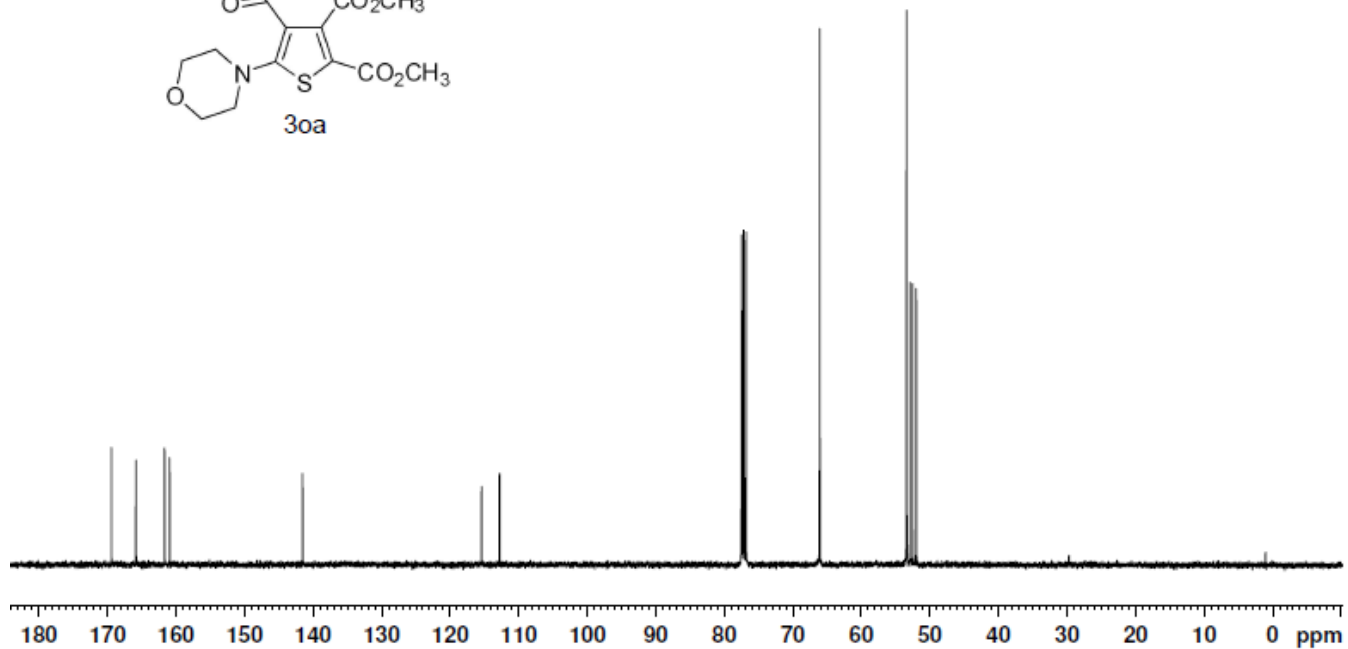

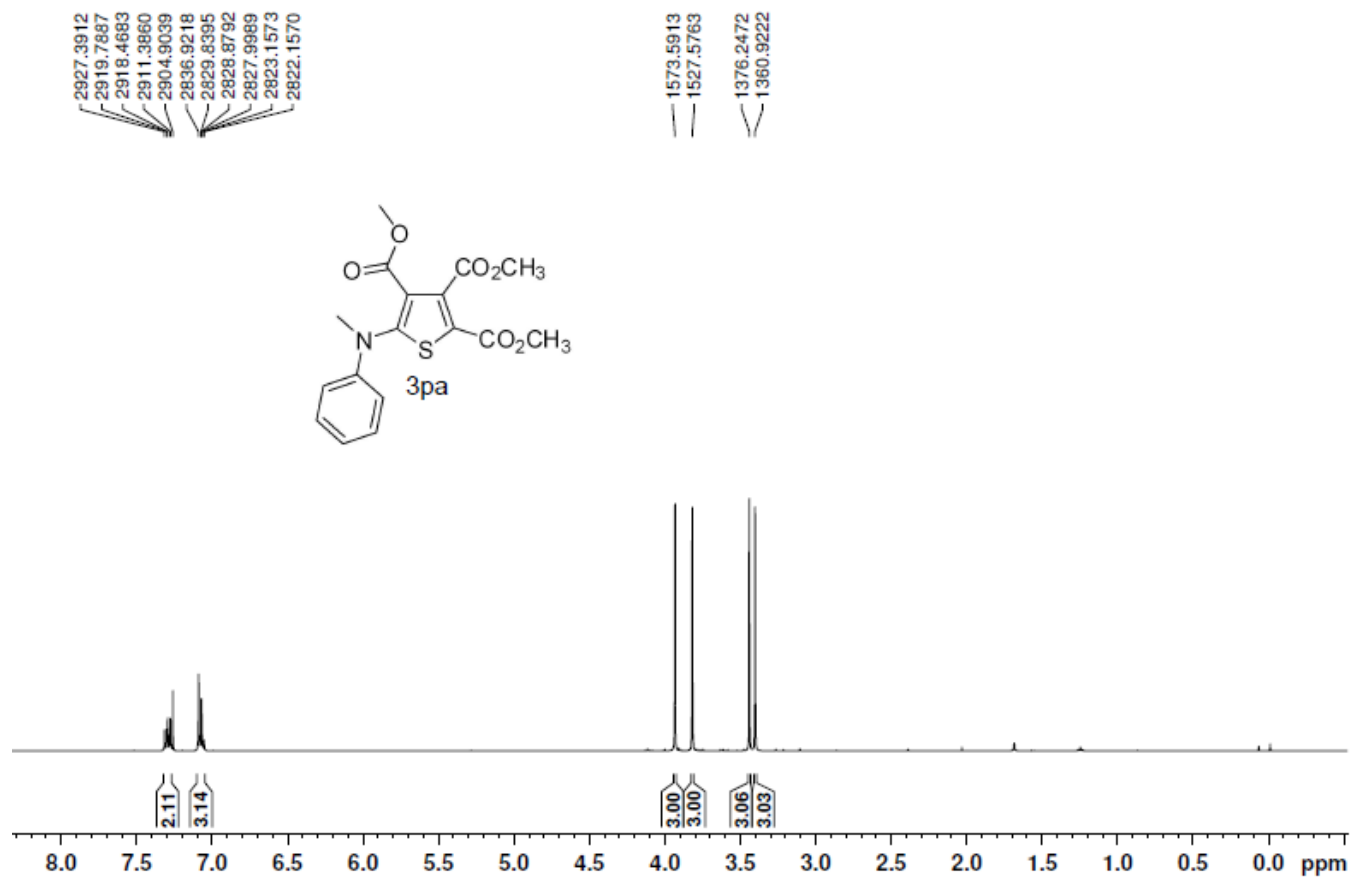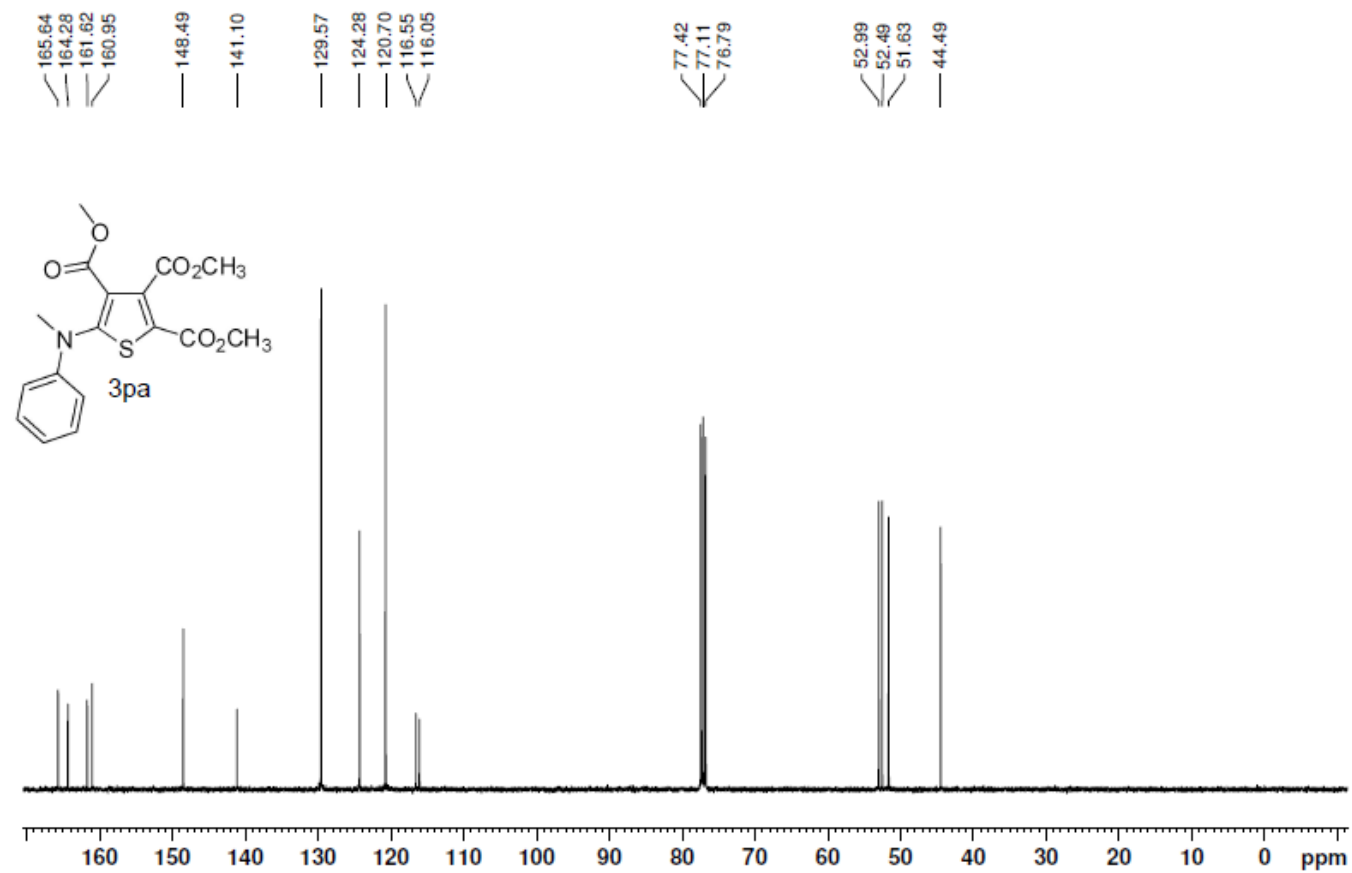

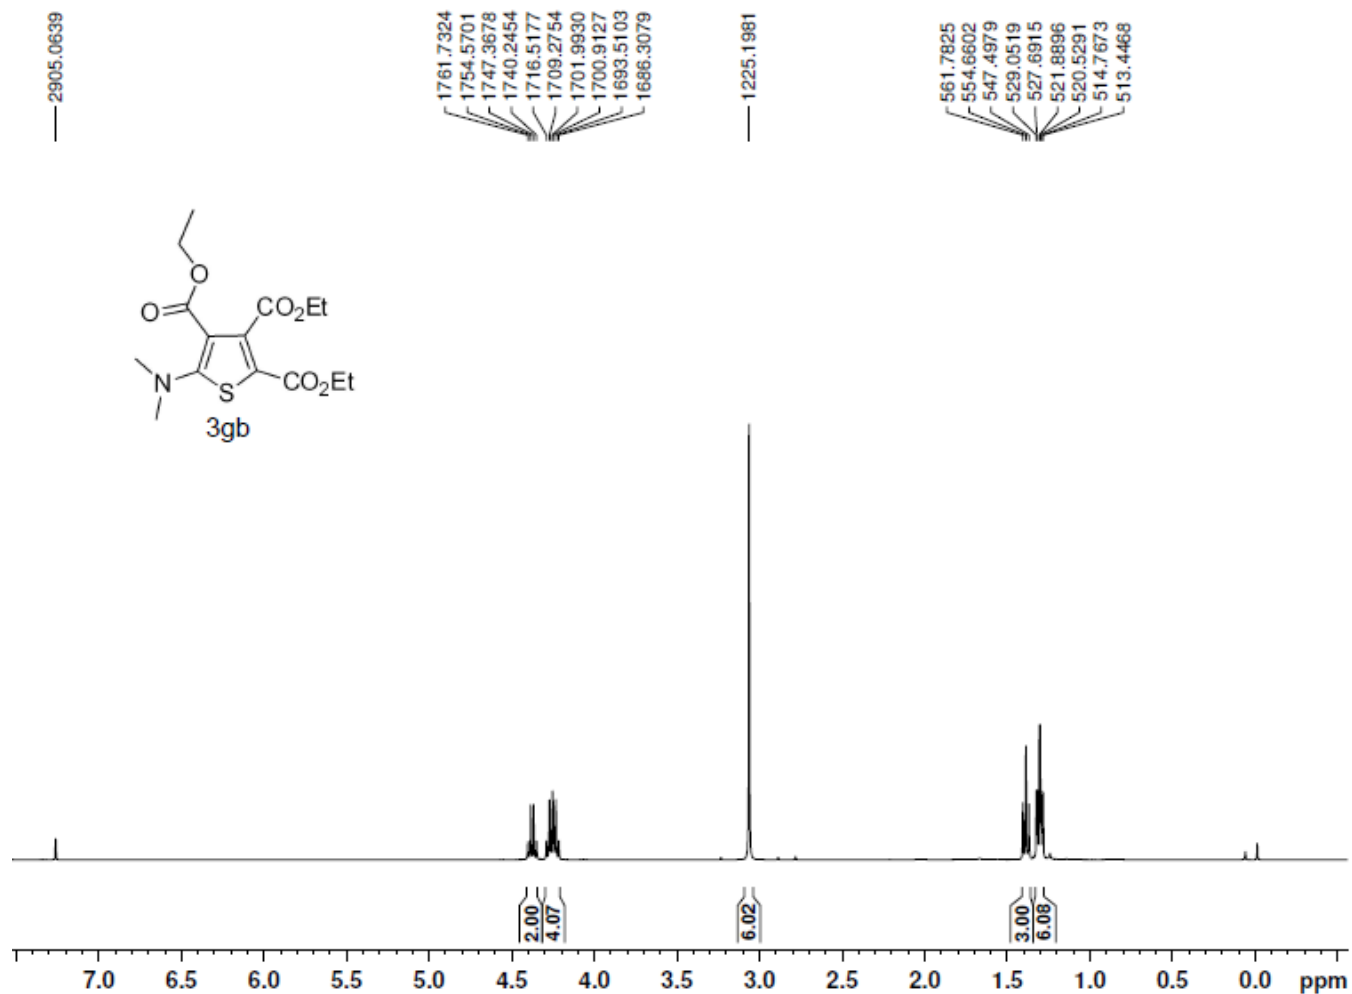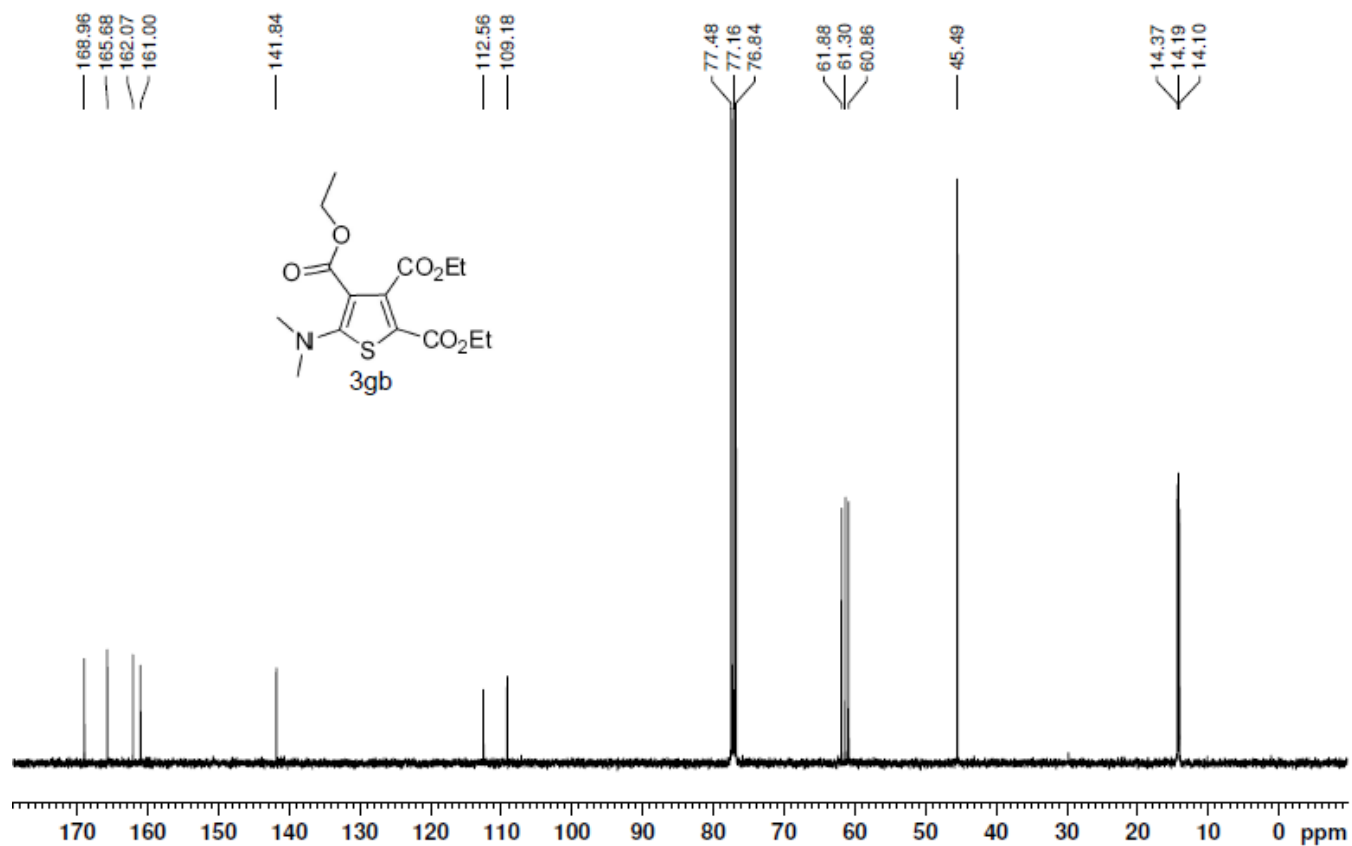

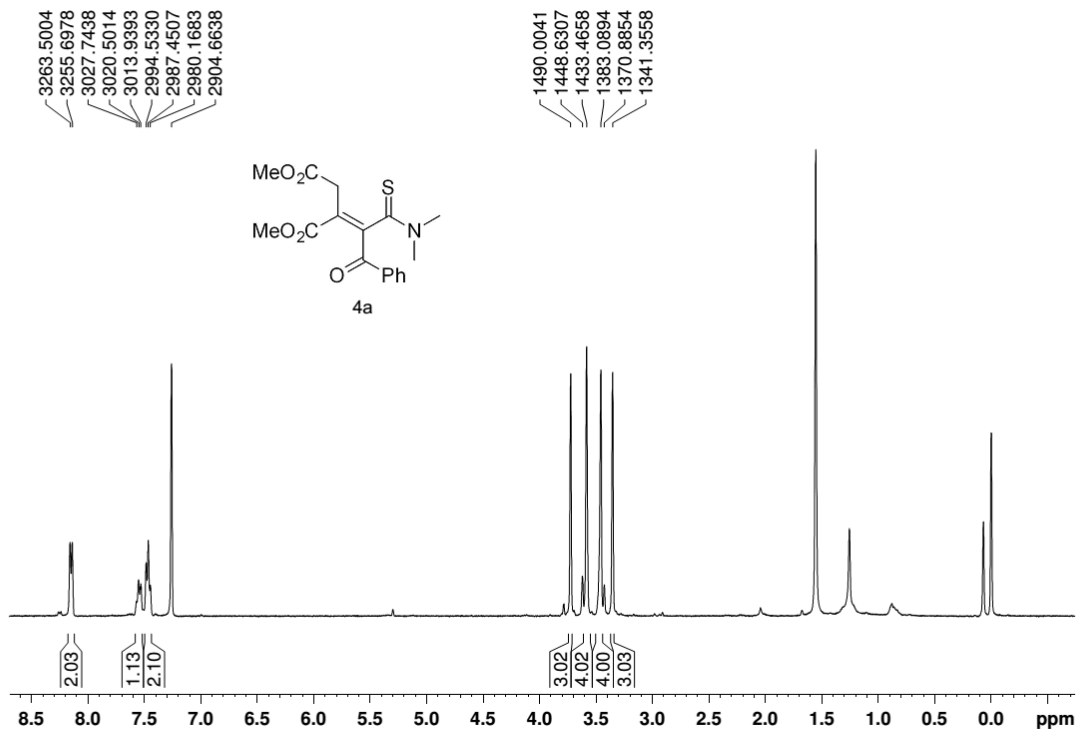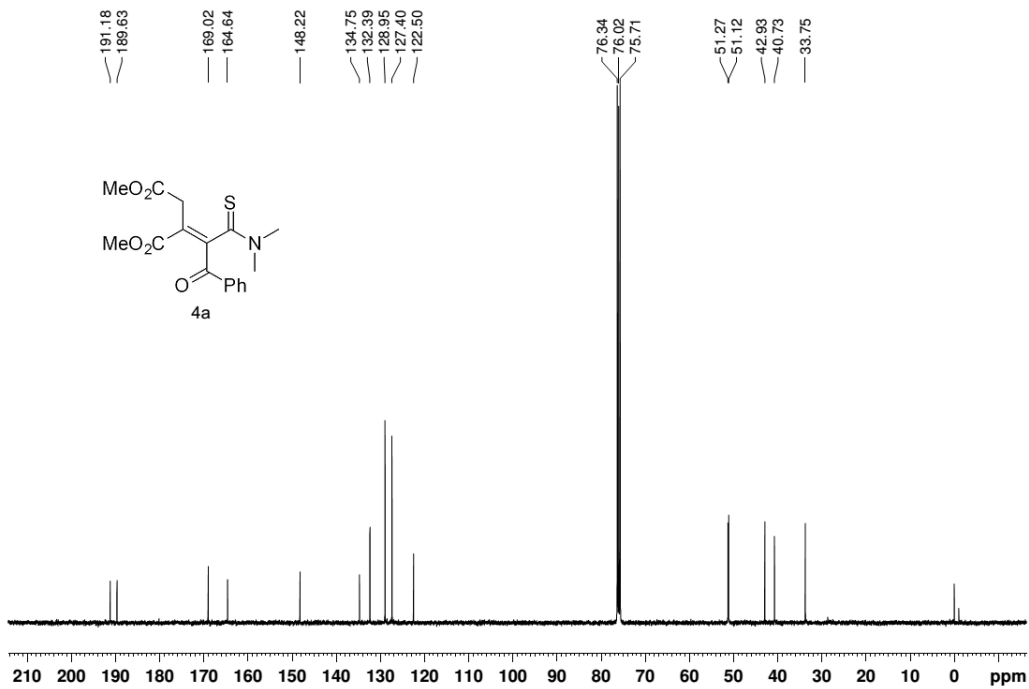

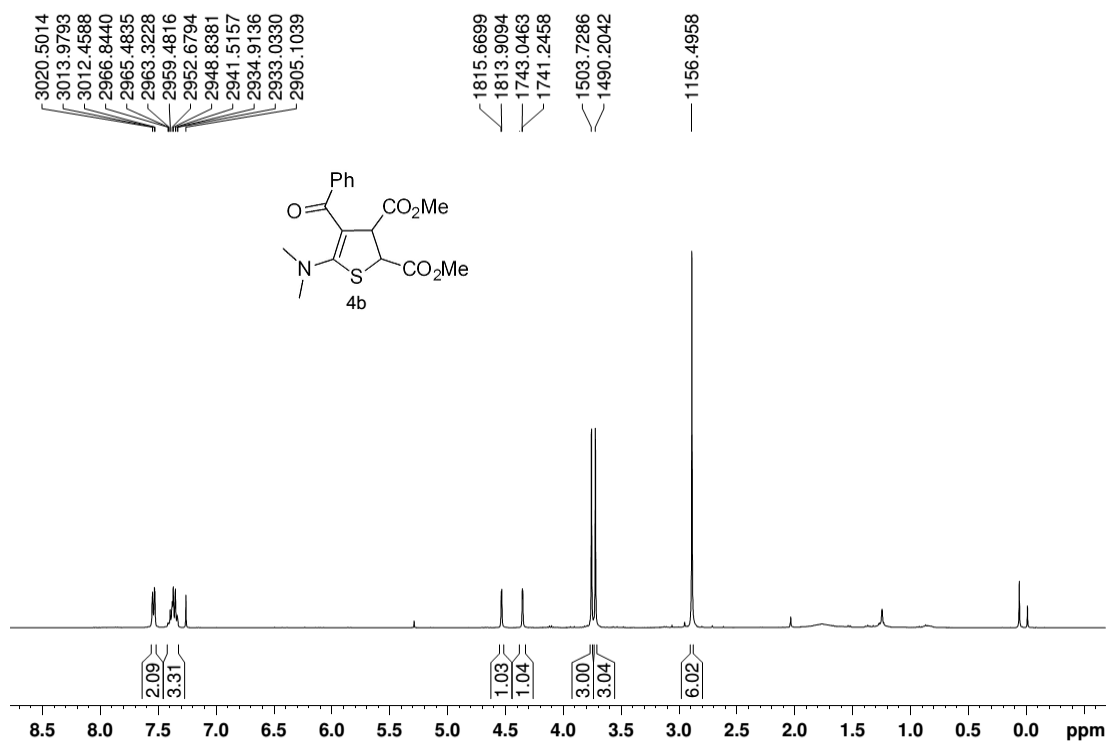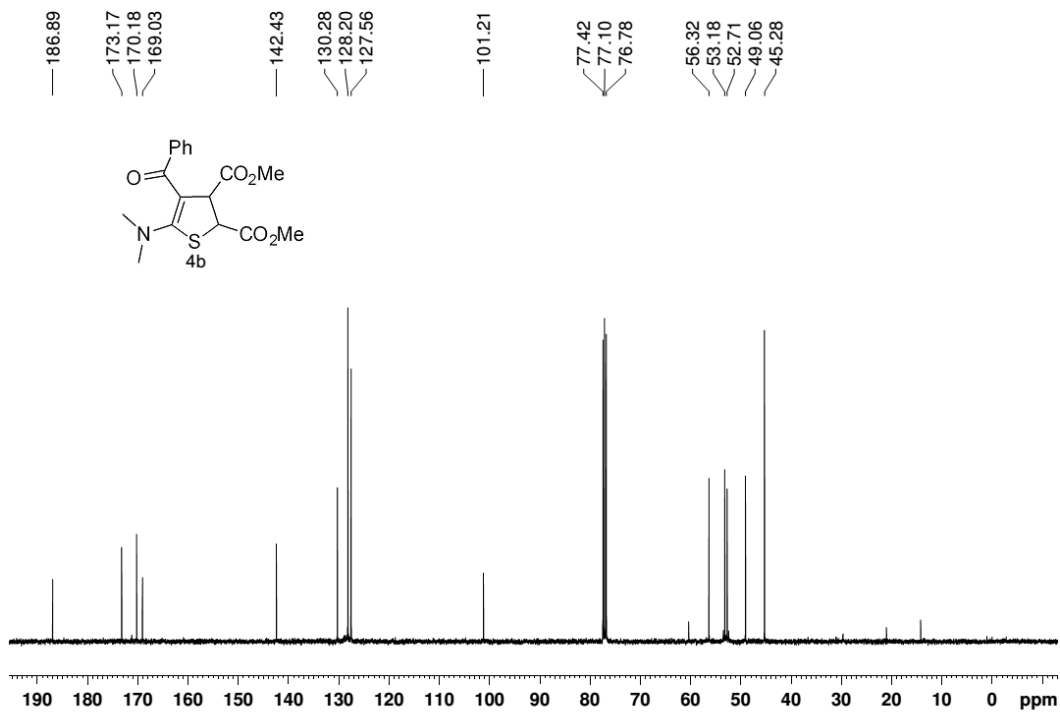

### 3. Crystal data and structure refinement for 3aa.

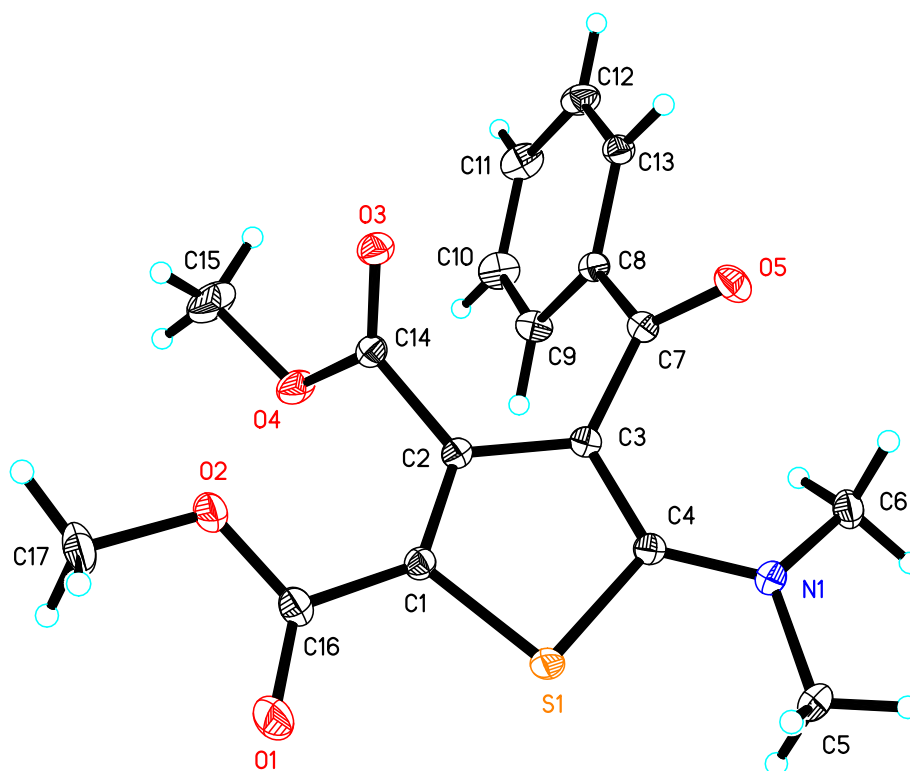

**Figure S1.** X-ray crystal structure of **3aa**. Displacement ellipsoids are drawn at the 30% probability level.

The X-ray crystallography data of **3aa** are listed below: a yellowish monoclinic crystal from n-hexane/dichloroform (1:3) was slowly exposed to graphite-monochromated Mo K $\alpha$  irradiation. The structures were solved by direct methods and refined on  $F^2$  using all the reflections.

|                      |                                                   |                             |
|----------------------|---------------------------------------------------|-----------------------------|
| Empirical formula    | C <sub>17</sub> H <sub>17</sub> NO <sub>5</sub> S |                             |
| Formula weight       | 347.37                                            |                             |
| Temperature          | 140(2) K                                          |                             |
| Wavelength           | 0.71073 Å                                         |                             |
| Crystal system       | Monoclinic                                        |                             |
| Space group          | P 21                                              |                             |
| Unit cell dimensions | a = 9.7645(9) Å                                   | $\alpha = 90^\circ$ .       |
|                      | b = 7.4690(7) Å                                   | $\beta = 95.351(2)^\circ$ . |
|                      | c = 11.4907(11) Å                                 | $\gamma = 90^\circ$ .       |
| Volume               | 834.38(14) Å <sup>3</sup>                         |                             |
| Z                    | 2                                                 |                             |
| Density (calculated) | 1.383 Mg/m <sup>3</sup>                           |                             |

|                                   |                                             |
|-----------------------------------|---------------------------------------------|
| Absorption coefficient            | 0.221 mm <sup>-1</sup>                      |
| F(000)                            | 364                                         |
| Crystal size                      | 0.450 x 0.350 x 0.320 mm <sup>3</sup>       |
| Theta range for data collection   | 2.095 to 30.550°.                           |
| Index ranges                      | -11<=h<=13, -10<=k<=10, -16<=l<=16          |
| Reflections collected             | 8491                                        |
| Independent reflections           | 5018 [R(int) = 0.0173]                      |
| Completeness to theta = 25.242°   | 99.9 %                                      |
| Absorption correction             | Semi-empirical from equivalents             |
| Max. and min. transmission        | 0.7461 and 0.6644                           |
| Refinement method                 | Full-matrix least-squares on F <sup>2</sup> |
| Data / restraints / parameters    | 5018 / 1 / 221                              |
| Goodness-of-fit on F <sup>2</sup> | 1.022                                       |
| Final R indices [I>2sigma(I)]     | R1 = 0.0333, wR2 = 0.0841                   |
| R indices (all data)              | R1 = 0.0362, wR2 = 0.0866                   |
| Absolute structure parameter      | 0.02(2)                                     |
| Extinction coefficient            | n / a                                       |
| Largest diff. peak and hole       | 0.266 and -0.295 e.Å <sup>-3</sup>          |
